# Supplementary material for: A scoring model based on ferroptosis genes for prognosis and immunotherapy response prediction and tumor microenvironment evaluation in liver hepatocellular carcinoma
Source: publisher site journal article supplement (doi:10.18632/aging.203721), 2021-11-28
Supplement: Supplementary file [file aging-v13i22-203721-supplementary-material-SD2.pdf]

**Supplementary Table 2. Univariate COX analysis of the prognostic value of 29 ferroptosis genes for LIHC.**

| id       | HR                | HR.95L            | HR.95H           | pvalue                | km                    |
|----------|-------------------|-------------------|------------------|-----------------------|-----------------------|
| ACSL3    | 1.46379818719     | 1.18789336299831  | 1.80378576020699 | 0.000349177122802298  | 6.93758387448895E-06  |
| ACSL4    | 1.05654404085644  | 0.982239186128069 | 1.13646994136896 | 0.139322693114131     | 0.0397248933577504    |
| ACSL5    | 1.00876523531185  | 0.897669844311402 | 1.13360976357001 | 0.883451769624826     | 0.369194106145713     |
| ACSL6    | 0.859317802283831 | 0.716378713861807 | 1.03077753572723 | 0.102386564883129     | 0.022173784832195     |
| ALOX15   | 1.3593995768274   | 0.934719154492843 | 1.97702935753058 | 0.108120017987151     | 0.112389499887817     |
| ATG5     | 1.84129261352537  | 1.3462384019538   | 2.51839383255051 | 0.00013302279860234   | 1.56318904487307E-08  |
| ATG7     | 1.69576753268569  | 1.1335310326705   | 2.53687587020551 | 0.0101745242290695    | 0.00102490601331551   |
| CP       | 0.997348662669684 | 0.89492218928448  | 1.11149814681018 | 0.961701741153814     | 0.099278931189842     |
| CYBB     | 1.09998379631822  | 0.954093364795836 | 1.26818233603539 | 0.189301537108621     | 0.000475761992478674  |
| FTH1     | 1.34868711348237  | 1.09040647133635  | 1.66814575838328 | 0.00581657558398524   | 0.00106578980954442   |
| FTL      | 1.20028169468967  | 0.992543336617312 | 1.45149948970196 | 0.0597312163266482    | 8.28693431587091E-06  |
| FTMT     | 5.718637160666    | 1.09617964478107  | 29.8334411983006 | 0.0385535241149496    | 0.151357178355422     |
| GCLC     | 1.02269618402473  | 0.847128825453001 | 1.23464985890364 | 0.815340763806589     | 0.141986763337725     |
| GCLM     | 1.26506228417442  | 1.06479694484477  | 1.50299321442352 | 0.00749529487187364   | 0.0000679366870214304 |
| GPX4     | 1.24615278713023  | 0.926086227435193 | 1.67683820671129 | 0.146232961433525     | 0.000561928133590461  |
| GSS      | 1.32808306494579  | 0.981173335995722 | 1.7976483488576  | 0.0662220381964282    | 0.000084461992999163  |
| HMOX1    | 1.17228828016108  | 1.03738393305447  | 1.32473597095017 | 0.0108230432292872    | 0.000991684837800433  |
| LPCAT3   | 1.08196203690749  | 0.939106460597802 | 1.24654860596295 | 0.275552793491397     | 0.00402031037708828   |
| MAP1LC3A | 0.891083658228384 | 0.773260747004526 | 1.02685942489336 | 0.111010568361656     | 0.0433310862897966    |
| MAP1LC3B | 1.23526410146654  | 0.96825997912955  | 1.57589638450581 | 0.0890587150486061    | 0.0000856601843057803 |
| MAP1LC3C | 0.947068471117035 | 0.62619055059968  | 1.43237340155484 | 0.796683837735756     | 0.0354307708762689    |
| NCOA4    | 1.19407896250527  | 0.948380477475154 | 1.50343095683875 | 0.131283761217079     | 0.0250329041557485    |
| PCBP1    | 1.11593901249658  | 0.928924965177179 | 1.34060330628998 | 0.241135215252762     | 0.00463752073142654   |
| PCBP2    | 1.92543680187583  | 1.41364874092777  | 2.6225092349212  | 0.000032404949655362  | 0.0000125267500723503 |
| PRNP     | 1.16767435746238  | 1.00623501195887  | 1.35501487114911 | 0.0411677782875497    | 0.0000305036009257131 |
| SAT1     | 0.911865568969191 | 0.716054665982726 | 1.16122253701167 | 0.454427725927531     | 0.018233432604589     |
| SAT2     | 0.879649000195695 | 0.71652838042782  | 1.07990469698253 | 0.220433877232993     | 0.0982779752876453    |
| SLC11A2  | 1.14632988016343  | 0.916487730383393 | 1.4338131876635  | 0.231640797775481     | 0.0384870692106054    |
| SLC39A14 | 1.05166268738388  | 0.906191421918889 | 1.22048651232375 | 0.507233359320072     | 0.0553811538994718    |
| SLC39A8  | 0.975695926391048 | 0.821596964594237 | 1.15869773356118 | 0.779070322910226     | 0.140428032819877     |
| SLC3A2   | 1.24371818330628  | 1.00278243427249  | 1.54254289526808 | 0.0471160752786631    | 0.00980934143661594   |
| SLC40A1  | 0.982887117348084 | 0.818798887805583 | 1.17985881495019 | 0.853058910133915     | 0.0404026921205252    |
| SLC7A11  | 1.3490456715743   | 1.17397490595933  | 1.55022412724077 | 0.0000242597698649002 | 1.71137940485622E-08  |
| STEAP3   | 0.956319476847638 | 0.841286724596093 | 1.08708115207359 | 0.494580203349751     | 0.137444349023113     |
| TF       | 0.962473579633993 | 0.87093830157584  | 1.06362917995151 | 0.453167966354231     | 0.123248580970357     |
| TFRC     | 1.12032382527174  | 0.953765000489936 | 1.31596931406244 | 0.166503088998337     | 0.00319819020799827   |
| TP53     | 0.936864038591002 | 0.77506909954809  | 1.13243351762675 | 0.500169693151779     | 0.00733035655433367   |
| VDAC2    | 1.56306484824683  | 1.14107736554308  | 2.14110961587789 | 0.00540317333945014   | 0.00876822404005007   |
| VDAC3    | 1.20193657160917  | 0.972860034892673 | 1.48495309742164 | 0.088209074542794     | 0.00801216396042403   |
