# Supplementary material for: A scoring model based on ferroptosis genes for prognosis and immunotherapy response prediction and tumor microenvironment evaluation in liver hepatocellular carcinoma
Source: Aging (Albany NY). 2021 Nov 28;13(22):24866–81. doi: 10.18632/aging.203721 (PMC8660622; doi:10.18632/aging.203721)
Supplement: Supplementary Table 1 [file aging-13-203721-s001.xls]

## Sheet: Sheet1
Supplementary Table 1. The tumor mutation burden (TMB) of the combined LIHC samples from TCGA database.
id	TMB
TCGA-WQ-AB4B	1.28947
TCGA-CC-A7II	3.52632
TCGA-5C-AAPD	1.57895
TCGA-XR-A8TF	3.05263
TCGA-O8-A75V	1.55263
TCGA-DD-A11C	2.10526
TCGA-BW-A5NO	2.02632
TCGA-DD-AACD	1.97368
TCGA-DD-AACI	6.68421
TCGA-EP-A2KB	1.73684
TCGA-DD-AACB	2.18421
TCGA-5R-AA1D	0.210526
TCGA-KR-A7K8	0.815789
TCGA-WX-AA46	0.631579
TCGA-DD-AACO	1
TCGA-2Y-A9H8	1.5
TCGA-EP-A3JL	1.94737
TCGA-DD-A4NV	2.34211
TCGA-QA-A7B7	1.94737
TCGA-DD-AAED	1.5
TCGA-DD-AAEI	2.73684
TCGA-DD-AADB	2.5
TCGA-CC-5264	2.15789
TCGA-CC-A8HS	1.10526
TCGA-G3-A3CH	0.631579
TCGA-DD-AAW1	2.34211
TCGA-MR-A8JO	0.5
TCGA-DD-AAE3	3.42105
TCGA-FV-A3I0	1.81579
TCGA-DD-AADO	4.44737
TCGA-XR-A8TC	1.23684
TCGA-DD-AA3A	0.868421
TCGA-LG-A6GG	4.15789
TCGA-DD-A1EH	0.684211
TCGA-3K-AAZ8	2.81579
TCGA-DD-AAD3	1.44737
TCGA-G3-AAV3	1.92105
TCGA-2Y-A9H1	2.86842
TCGA-DD-AAEB	2.94737
TCGA-DD-AADI	1.84211
TCGA-ED-A8O6	1.55263
TCGA-DD-AADD	1.92105
TCGA-G3-A5SL	2.60526
TCGA-CC-A1HT	1.63158
TCGA-MI-A75H	2.89474
TCGA-ZP-A9CY	1.84211
TCGA-BC-A10Z	4.05263
TCGA-CC-A3MB	1.34211
TCGA-ED-A66X	0.815789
TCGA-2Y-A9H6	1.10526
TCGA-ZP-A9CV	2.21053
TCGA-FV-A3R2	1.84211
TCGA-DD-AADJ	1.39474
TCGA-DD-A1EL	1.94737
TCGA-RG-A7D4	1.73684
TCGA-DD-AAEG	1.73684
TCGA-CC-A3MA	0.947368
TCGA-DD-AADE	2.44737
TCGA-DD-AAEA	4
TCGA-ES-A2HT	1.44737
TCGA-DD-AAVQ	0.947368
TCGA-CC-A9FW	3.34211
TCGA-DD-AADA	2.55263
TCGA-DD-AAEE	1.60526
TCGA-DD-AADQ	2.60526
TCGA-CC-A7IK	6.73684
TCGA-G3-A7M9	2.71053
TCGA-DD-AAVR	1.34211
TCGA-DD-AADG	3.13158
TCGA-BC-A10U	3.02632
TCGA-DD-AADR	2
TCGA-DD-AACK	3.07895
TCGA-G3-AAV5	1.86842
TCGA-DD-AACM	1.21053
TCGA-DD-AAD5	2.71053
TCGA-ED-A7PX	0.684211
TCGA-DD-AACG	2.21053
TCGA-5C-A9VG	2.78947
TCGA-ZS-A9CF	1.94737
TCGA-CC-A8HU	1.92105
TCGA-EP-A2KA	2.31579
TCGA-DD-A39V	1.5
TCGA-DD-AACA	2.42105
TCGA-DD-AACQ	4.44737
TCGA-DD-AADM	3.57895
TCGA-CC-A7IG	3.05263
TCGA-G3-AAV4	2.10526
TCGA-DD-AADK	1.21053
TCGA-BD-A3ER	0.973684
TCGA-BW-A5NQ	2.07895
TCGA-CC-A7IE	3.42105
TCGA-K7-A5RG	2.36842
TCGA-DD-AAEK	1.63158
TCGA-DD-A119	1.15789
TCGA-DD-AAE4	1.26316
TCGA-DD-AACJ	2.07895
TCGA-DD-A3A7	2.44737
TCGA-DD-AACE	1.57895
TCGA-CC-5263	2.71053
TCGA-FV-A23B	1.89474
TCGA-CC-A7IJ	3.15789
TCGA-DD-AAC8	12.1316
TCGA-DD-A39X	1.34211
TCGA-DD-AAVP	1.63158
TCGA-HP-A5N0	2.73684
TCGA-DD-AADP	2.21053
TCGA-DD-AAE1	1.10526
TCGA-DD-AAW3	1.97368
TCGA-ED-A4XI	1.94737
TCGA-G3-A5SM	2.26316
TCGA-2Y-A9HB	1.47368
TCGA-ZP-A9D0	1.26316
TCGA-ED-A8O5	2.65789
TCGA-CC-A5UC	1.10526
TCGA-G3-A5SK	1.71053
TCGA-DD-AAVZ	0.921053
TCGA-CC-5259	2.92105
TCGA-2Y-A9GZ	1.97368
TCGA-CC-A7IH	16.1316
TCGA-LG-A9QD	2.28947
TCGA-DD-AACS	1.10526
TCGA-DD-AAD1	2.26316
TCGA-2Y-A9H3	2.68421
TCGA-G3-AAV1	1.18421
TCGA-WX-AA44	1.60526
TCGA-DD-AACH	2.10526
TCGA-5C-A9VH	2.23684
TCGA-BW-A5NP	1.52632
TCGA-G3-A5SJ	2.31579
TCGA-UB-A7MA	1.73684
TCGA-DD-A1EI	1.21053
TCGA-DD-A1ED	0.368421
TCGA-RC-A7SF	1.92105
TCGA-WQ-A9G7	10.0263
TCGA-DD-AAE8	1.10526
TCGA-MI-A75I	3.65789
TCGA-DD-AADS	3
TCGA-DD-AAVS	1.13158
TCGA-G3-A25U	1.5
TCGA-2Y-A9GS	1.39474
TCGA-CC-A123	1.73684
TCGA-DD-AAEH	1.92105
TCGA-DD-AAD8	2.36842
TCGA-G3-AAUZ	1.81579
TCGA-DD-AACP	3.28947
TCGA-DD-AACZ	3.55263
TCGA-G3-A3CI	0.342105
TCGA-DD-A1EB	3
TCGA-BD-A3EP	2.23684
TCGA-UB-AA0V	0.578947
TCGA-UB-A7ME	1.78947
TCGA-HP-A5MZ	1
TCGA-MI-A75G	5.07895
TCGA-ZP-A9D2	1.36842
TCGA-ED-A7PY	0.605263
TCGA-DD-A39W	0.736842
TCGA-2Y-A9H4	1.47368
TCGA-DD-AACN	0.947368
TCGA-5R-AAAM	1.34211
TCGA-UB-A7MD	2.36842
TCGA-DD-A1EA	1.84211
TCGA-DD-A3A9	6.65789
TCGA-EP-A12J	1.05263
TCGA-DD-A73C	1.65789
TCGA-DD-AACU	2.26316
TCGA-DD-A1EE	7.21053
TCGA-UB-A7MB	31.5789
TCGA-G3-A3CG	2
TCGA-G3-A25Z	1.60526
TCGA-G3-A5SI	0.605263
TCGA-ED-A66Y	2.05263
TCGA-MI-A75E	2.57895
TCGA-DD-AADL	2.76316
TCGA-DD-A1EJ	1.23684
TCGA-BC-A10Q	0.736842
TCGA-RC-A7S9	1.28947
TCGA-G3-A7M7	1.42105
TCGA-CC-A7IL	2.26316
TCGA-DD-AAVU	1.18421
TCGA-BC-A10R	2.31579
TCGA-DD-AADU	2.02632
TCGA-DD-A73F	1.21053
TCGA-DD-A4NF	2.57895
TCGA-G3-AAV6	1.36842
TCGA-DD-AAD6	2.18421
TCGA-G3-A3CK	4.60526
TCGA-DD-AACL	6.36842
TCGA-2Y-A9H5	1.63158
TCGA-BC-A217	2.15789
TCGA-DD-AAE6	1.71053
TCGA-CC-A9FV	0.184211
TCGA-BC-4073	2.84211
TCGA-DD-A1EK	1.18421
TCGA-GJ-A9DB	1.63158
TCGA-DD-A3A2	1.44737
TCGA-G3-A25S	3
TCGA-2Y-A9HA	2.97368
TCGA-2Y-A9GU	2.89474
TCGA-DD-AADN	2.28947
TCGA-DD-AAE0	1.36842
TCGA-WJ-A86L	3.07895
TCGA-ZS-A9CE	2.71053
TCGA-DD-AAVX	1.5
TCGA-PD-A5DF	0.973684
TCGA-ED-A459	3.05263
TCGA-CC-A3MC	2.10526
TCGA-DD-A39Z	1.52632
TCGA-ZP-A9D1	2.81579
TCGA-K7-A5RF	0.157895
TCGA-DD-AADC	1.78947
TCGA-DD-A3A8	2.36842
TCGA-G3-A25W	1.84211
TCGA-2Y-A9GT	1.97368
TCGA-4R-AA8I	24.4474
TCGA-ED-A7XP	1.42105
TCGA-CC-A7IF	2.60526
TCGA-CC-5262	2.5
TCGA-DD-A4NL	0.447368
TCGA-XR-A8TD	1.26316
TCGA-DD-AAD0	2.28947
TCGA-ZS-A9CG	1.73684
TCGA-DD-AACF	2.81579
TCGA-G3-AAV0	3.60526
TCGA-2Y-A9GX	0.815789
TCGA-BC-A69H	2.73684
TCGA-FV-A3R3	0.842105
TCGA-DD-AACC	1.44737
TCGA-FV-A4ZP	2.28947
TCGA-EP-A2KC	1.81579
TCGA-DD-A11D	2.57895
TCGA-RC-A7SH	1.44737
TCGA-DD-AADF	4.76316
TCGA-DD-A113	2.5
TCGA-WX-AA47	0.789474
TCGA-ZP-A9CZ	1.05263
TCGA-BC-A10Y	1.28947
TCGA-ED-A97K	1.07895
TCGA-G3-A6UC	2.68421
TCGA-DD-AACX	2.73684
TCGA-RC-A6M6	4.34211
TCGA-5R-AA1C	2.02632
TCGA-DD-AACT	4
TCGA-BC-A3KF	1.84211
TCGA-DD-A11B	0.973684
TCGA-DD-A4NN	1.21053
TCGA-DD-A4NP	0.447368
TCGA-DD-AADW	0.736842
TCGA-DD-A115	1.63158
TCGA-DD-AAVW	0.763158
TCGA-DD-AAE2	1.57895
TCGA-CC-5258	2.89474
TCGA-K7-A6G5	1.57895
TCGA-DD-A11A	2.36842
TCGA-DD-A3A6	0.342105
TCGA-CC-5260	1.07895
TCGA-T1-A6J8	1.92105
TCGA-G3-AAV2	0.973684
TCGA-DD-AAD2	1.65789
TCGA-G3-A25T	1.02632
TCGA-2Y-A9GW	1.60526
TCGA-DD-AAC9	1.57895
TCGA-CC-A8HV	3.18421
TCGA-G3-A7M5	4.13158
TCGA-DD-A4NH	1.15789
TCGA-XR-A8TE	0.184211
TCGA-DD-A4NS	0.342105
TCGA-EP-A26S	1.92105
TCGA-NI-A8LF	2.21053
TCGA-DD-AAE9	2.34211
TCGA-ZS-A9CD	1.97368
TCGA-XR-A8TG	1.63158
TCGA-BC-A8YO	1.52632
TCGA-DD-AACW	1.21053
TCGA-DD-A114	2.10526
TCGA-BD-A2L6	1.78947
TCGA-CC-A3M9	2.47368
TCGA-2Y-A9H7	1.86842
TCGA-EP-A3RK	1.15789
TCGA-KR-A7K7	1.52632
TCGA-FV-A496	2.26316
TCGA-DD-A4NJ	1.63158
TCGA-2Y-A9GY	1.60526
TCGA-RC-A6M5	0.289474
TCGA-MI-A75C	2.47368
TCGA-CC-A8HT	4.36842
TCGA-NI-A4U2	2.34211
TCGA-DD-A73E	2.47368
TCGA-DD-A1EC	0.526316
TCGA-DD-A4NE	1.21053
TCGA-G3-A7M8	0.421053
TCGA-DD-A4NQ	1.97368
TCGA-DD-A4NA	0.657895
TCGA-DD-A73A	1.55263
TCGA-DD-A3A3	1.18421
TCGA-DD-A73G	2.34211
TCGA-DD-A4NR	1.13158
TCGA-DD-A4NG	1.63158
TCGA-GJ-A3OU	0.894737
TCGA-2V-A95S	2
TCGA-DD-AADY	1.07895
TCGA-DD-AAVY	2.05263
TCGA-CC-A5UD	4.55263
TCGA-DD-AACY	1.60526
TCGA-DD-A118	2.60526
TCGA-RC-A7SB	1.21053
TCGA-FV-A3I1	1.5
TCGA-DD-AAW0	2.02632
TCGA-DD-A4NK	1.52632
TCGA-2Y-A9H0	1.71053
TCGA-RC-A6M4	3.52632
TCGA-LG-A9QC	0.973684
TCGA-G3-A25V	1.07895
TCGA-DD-A1EF	1.86842
TCGA-ED-A7XO	1.26316
TCGA-GJ-A6C0	1.63158
TCGA-UB-AA0U	1.78947
TCGA-KR-A7K0	1.97368
TCGA-CC-A9FS	2.28947
TCGA-BC-A10T	1.55263
TCGA-2Y-A9H9	2.73684
TCGA-DD-AAE7	4.73684
TCGA-BC-A216	1.26316
TCGA-DD-A3A4	0.710526
TCGA-G3-A25Y	1.52632
TCGA-FV-A495	1.92105
TCGA-G3-A7M6	1.76316
TCGA-DD-AACV	2.26316
TCGA-ED-A7PZ	5.86842
TCGA-YA-A8S7	1.31579
TCGA-CC-A5UE	3.13158
TCGA-UB-A7MF	2.02632
TCGA-FV-A2QR	2.42105
TCGA-MR-A520	0.315789
TCGA-K7-AAU7	1.52632
TCGA-G3-AAV7	1.73684
TCGA-FV-A2QQ	2.76316
TCGA-RC-A7SK	2.76316
TCGA-UB-A7MC	1.42105
TCGA-DD-AADV	1.86842
TCGA-ED-A82E	0.605263
TCGA-DD-AAVV	1.92105
TCGA-DD-A4NB	0.447368
TCGA-DD-AAW2	2.55263
TCGA-DD-A73B	1.78947
TCGA-BC-A5W4	1.52632
TCGA-DD-A4NO	1.13158
TCGA-RC-A6M3	1.63158
TCGA-ES-A2HS	1.31579
TCGA-DD-A1E9	1.02632
TCGA-BC-A10W	2.18421
TCGA-DD-A116	2.13158
TCGA-CC-A9FU	1.05263
TCGA-FV-A4ZQ	1.57895
TCGA-KR-A7K2	1.13158
TCGA-DD-A4ND	1.18421
TCGA-2Y-A9GV	1.34211
TCGA-2Y-A9H2	1.15789
TCGA-DD-A4NI	2.57895
TCGA-DD-A73D	1.42105
TCGA-ZP-A9D4	1.42105
TCGA-DD-A3A5	1.34211
