# Supplementary material for: A scoring model based on ferroptosis genes for prognosis and immunotherapy response prediction and tumor microenvironment evaluation in liver hepatocellular carcinoma
Source: Aging (Albany NY). 2021 Nov 28;13(22):24866–81. doi: 10.18632/aging.203721 (PMC8660622; doi:10.18632/aging.203721)
Supplement: Supplementary Table 3 [file aging-13-203721-s003.xls]

## Sheet: Sheet1
Supplementary Table 3. The clustered A, B, C groups of the 538 LIHC samples according to the expression level of ferroptosis genes.
ID	ferrcluster
TCGA_TCGA-DD-AAE4	A
TCGA_TCGA-CC-A3M9	B
TCGA_TCGA-DD-A4NI	A
TCGA_TCGA-G3-AAV3	C
TCGA_TCGA-UB-A7MA	A
TCGA_TCGA-UB-A7MF	B
TCGA_TCGA-BC-A112	A
TCGA_TCGA-BC-A10U	B
TCGA_TCGA-BC-A5W4	C
TCGA_TCGA-FV-A3I1	B
TCGA_TCGA-CC-A123	A
TCGA_TCGA-WQ-A9G7	A
TCGA_TCGA-ED-A66X	B
TCGA_TCGA-DD-A1EK	B
TCGA_TCGA-DD-AADM	A
TCGA_TCGA-MR-A8JO	A
TCGA_TCGA-QA-A7B7	A
TCGA_TCGA-CC-A8HT	B
TCGA_TCGA-FV-A4ZP	A
TCGA_TCGA-DD-A4NJ	B
TCGA_TCGA-CC-5258	B
TCGA_TCGA-EP-A2KB	A
TCGA_TCGA-G3-A25X	A
TCGA_TCGA-DD-AAD1	B
TCGA_TCGA-G3-A3CK	C
TCGA_TCGA-DD-AACA	B
TCGA_TCGA-5C-A9VH	A
TCGA_TCGA-FV-A23B	B
TCGA_TCGA-DD-AADR	A
TCGA_TCGA-DD-A4NQ	B
TCGA_TCGA-G3-A5SM	A
TCGA_TCGA-MI-A75E	B
TCGA_TCGA-DD-A11D	B
TCGA_TCGA-CC-5262	B
TCGA_TCGA-2Y-A9GY	B
TCGA_TCGA-ES-A2HT	A
TCGA_TCGA-DD-AAW0	B
TCGA_TCGA-G3-A3CI	A
TCGA_TCGA-DD-AAVV	B
TCGA_TCGA-DD-A39Y	A
TCGA_TCGA-DD-A1EB	C
TCGA_TCGA-DD-AAD6	A
TCGA_TCGA-ED-A4XI	B
TCGA_TCGA-HP-A5MZ	B
TCGA_TCGA-DD-AAVU	A
TCGA_TCGA-DD-A4NO	B
TCGA_TCGA-BC-A10W	B
TCGA_TCGA-LG-A9QC	B
TCGA_TCGA-DD-A11C	B
TCGA_TCGA-DD-AADB	B
TCGA_TCGA-DD-AAVZ	B
TCGA_TCGA-BC-A216	B
TCGA_TCGA-DD-A1EF	B
TCGA_TCGA-DD-AADL	C
TCGA_TCGA-KR-A7K8	A
TCGA_TCGA-ED-A7PX	B
TCGA_TCGA-DD-AADK	A
TCGA_TCGA-BW-A5NO	B
TCGA_TCGA-DD-A39W	B
TCGA_TCGA-GJ-A9DB	B
TCGA_TCGA-DD-A1EA	B
TCGA_TCGA-UB-A7MD	B
TCGA_TCGA-ES-A2HS	A
TCGA_TCGA-G3-A3CJ	C
TCGA_TCGA-FV-A3R2	B
TCGA_TCGA-BW-A5NQ	B
TCGA_TCGA-2Y-A9GZ	A
TCGA_TCGA-4R-AA8I	C
TCGA_TCGA-DD-A4NG	B
TCGA_TCGA-RC-A6M5	A
TCGA_TCGA-2Y-A9H0	B
TCGA_TCGA-DD-A11B	B
TCGA_TCGA-G3-A25V	B
TCGA_TCGA-5R-AA1C	C
TCGA_TCGA-ED-A8O6	B
TCGA_TCGA-DD-AADD	B
TCGA_TCGA-BC-A10S	A
TCGA_TCGA-CC-A9FV	B
TCGA_TCGA-DD-AAEB	C
TCGA_TCGA-WX-AA44	B
TCGA_TCGA-PD-A5DF	B
TCGA_TCGA-YA-A8S7	B
TCGA_TCGA-5R-AA1D	A
TCGA_TCGA-DD-AACH	B
TCGA_TCGA-CC-A8HV	A
TCGA_TCGA-BW-A5NP	B
TCGA_TCGA-G3-AAV0	A
TCGA_TCGA-DD-AAED	A
TCGA_TCGA-DD-A73F	B
TCGA_TCGA-DD-A4NN	A
TCGA_TCGA-DD-AAEI	A
TCGA_TCGA-UB-AA0V	C
TCGA_TCGA-DD-AADO	A
TCGA_TCGA-DD-AAVY	C
TCGA_TCGA-FV-A3R3	A
TCGA_TCGA-DD-A4NS	C
TCGA_TCGA-MI-A75H	A
TCGA_TCGA-UB-A7MC	C
TCGA_TCGA-FV-A4ZQ	B
TCGA_TCGA-DD-AAEG	A
TCGA_TCGA-DD-AAD5	B
TCGA_TCGA-K7-A5RG	B
TCGA_TCGA-XR-A8TD	C
TCGA_TCGA-DD-AACY	A
TCGA_TCGA-CC-A9FU	B
TCGA_TCGA-KR-A7K7	A
TCGA_TCGA-G3-A25Y	B
TCGA_TCGA-K7-AAU7	B
TCGA_TCGA-BC-A3KF	B
TCGA_TCGA-BC-A10Z	B
TCGA_TCGA-UB-AA0U	B
TCGA_TCGA-DD-AAEE	C
TCGA_TCGA-ZP-A9D0	A
TCGA_TCGA-DD-A1EG	B
TCGA_TCGA-CC-A7IL	A
TCGA_TCGA-RC-A6M4	C
TCGA_TCGA-ED-A7XP	B
TCGA_TCGA-2Y-A9HA	B
TCGA_TCGA-DD-AAE2	B
TCGA_TCGA-DD-AADF	A
TCGA_TCGA-DD-AACW	B
TCGA_TCGA-MI-A75I	B
TCGA_TCGA-FV-A3I0	A
TCGA_TCGA-2Y-A9H1	A
TCGA_TCGA-CC-A8HU	C
TCGA_TCGA-DD-AAD2	B
TCGA_TCGA-BC-A10R	B
TCGA_TCGA-G3-A5SL	C
TCGA_TCGA-CC-A1HT	B
TCGA_TCGA-2Y-A9GV	C
TCGA_TCGA-ED-A7XO	A
TCGA_TCGA-CC-A5UC	B
TCGA_TCGA-DD-AAVQ	A
TCGA_TCGA-BD-A3EP	B
TCGA_TCGA-DD-A39V	A
TCGA_TCGA-DD-A3A1	B
TCGA_TCGA-DD-A4NR	B
TCGA_TCGA-DD-AAC9	A
TCGA_TCGA-CC-5259	A
TCGA_TCGA-DD-AADC	B
TCGA_TCGA-ZS-A9CF	A
TCGA_TCGA-NI-A8LF	C
TCGA_TCGA-DD-A39Z	A
TCGA_TCGA-G3-A7M5	A
TCGA_TCGA-MI-A75G	B
TCGA_TCGA-CC-A7IK	C
TCGA_TCGA-G3-A5SJ	A
TCGA_TCGA-ZS-A9CE	A
TCGA_TCGA-DD-A73B	C
TCGA_TCGA-RC-A7SB	A
TCGA_TCGA-DD-AADN	A
TCGA_TCGA-CC-A5UE	B
TCGA_TCGA-DD-AACZ	B
TCGA_TCGA-DD-A3A3	A
TCGA_TCGA-2Y-A9H8	B
TCGA_TCGA-DD-AAEK	B
TCGA_TCGA-DD-A4ND	B
TCGA_TCGA-2Y-A9H7	B
TCGA_TCGA-RC-A7S9	A
TCGA_TCGA-G3-A25S	A
TCGA_TCGA-BC-A217	A
TCGA_TCGA-DD-AAW2	C
TCGA_TCGA-2Y-A9H6	B
TCGA_TCGA-2Y-A9GW	B
TCGA_TCGA-DD-A73D	A
TCGA_TCGA-DD-A115	C
TCGA_TCGA-XR-A8TF	C
TCGA_TCGA-DD-AADU	C
TCGA_TCGA-DD-AAE1	A
TCGA_TCGA-2Y-A9HB	B
TCGA_TCGA-BD-A2L6	C
TCGA_TCGA-DD-A3A9	A
TCGA_TCGA-KR-A7K2	A
TCGA_TCGA-ED-A66Y	A
TCGA_TCGA-DD-AAE3	C
TCGA_TCGA-G3-AAV6	A
TCGA_TCGA-ED-A97K	B
TCGA_TCGA-DD-AAVW	B
TCGA_TCGA-EP-A3RK	B
TCGA_TCGA-FV-A496	A
TCGA_TCGA-CC-A3MB	B
TCGA_TCGA-CC-A7IF	C
TCGA_TCGA-ZS-A9CD	B
TCGA_TCGA-G3-A7M6	A
TCGA_TCGA-DD-A1ED	C
TCGA_TCGA-EP-A12J	C
TCGA_TCGA-DD-A1EJ	B
TCGA_TCGA-G3-AAV2	A
TCGA_TCGA-DD-AADY	B
TCGA_TCGA-CC-5263	B
TCGA_TCGA-DD-AADP	B
TCGA_TCGA-BC-A69I	A
TCGA_TCGA-5C-A9VG	A
TCGA_TCGA-DD-A1EE	C
TCGA_TCGA-BC-A110	A
TCGA_TCGA-GJ-A3OU	B
TCGA_TCGA-G3-A25U	C
TCGA_TCGA-DD-A4NL	A
TCGA_TCGA-BC-A10Q	A
TCGA_TCGA-2Y-A9GU	A
TCGA_TCGA-ZP-A9CV	B
TCGA_TCGA-DD-A113	B
TCGA_TCGA-2Y-A9GT	B
TCGA_TCGA-CC-A3MC	B
TCGA_TCGA-DD-A73A	A
TCGA_TCGA-DD-AADG	C
TCGA_TCGA-FV-A2QR	A
TCGA_TCGA-G3-AAV7	B
TCGA_TCGA-2Y-A9H4	C
TCGA_TCGA-3K-AAZ8	A
TCGA_TCGA-CC-5261	B
TCGA_TCGA-ZP-A9D2	B
TCGA_TCGA-2Y-A9H5	B
TCGA_TCGA-G3-A25T	A
TCGA_TCGA-DD-AAEA	A
TCGA_TCGA-RG-A7D4	B
TCGA_TCGA-DD-AACD	A
TCGA_TCGA-DD-AAD8	A
TCGA_TCGA-5R-AAAM	C
TCGA_TCGA-EP-A3JL	A
TCGA_TCGA-DD-A73G	A
TCGA_TCGA-G3-AAV4	C
TCGA_TCGA-ED-A459	C
TCGA_TCGA-DD-A73C	C
TCGA_TCGA-MR-A520	A
TCGA_TCGA-RC-A6M3	A
TCGA_TCGA-DD-AACU	B
TCGA_TCGA-WX-AA47	A
TCGA_TCGA-DD-A3A4	B
TCGA_TCGA-DD-AADQ	A
TCGA_TCGA-CC-A8HS	A
TCGA_TCGA-DD-A1EL	B
TCGA_TCGA-WQ-AB4B	A
TCGA_TCGA-DD-A11A	C
TCGA_TCGA-DD-AAD0	C
TCGA_TCGA-DD-A3A6	A
TCGA_TCGA-DD-A114	B
TCGA_TCGA-5C-AAPD	A
TCGA_TCGA-HP-A5N0	B
TCGA_TCGA-T1-A6J8	A
TCGA_TCGA-XR-A8TC	B
TCGA_TCGA-DD-AACK	B
TCGA_TCGA-MI-A75C	A
TCGA_TCGA-DD-AACP	B
TCGA_TCGA-DD-AACT	A
TCGA_TCGA-DD-A73E	C
TCGA_TCGA-BC-4072	B
TCGA_TCGA-BC-4073	B
TCGA_TCGA-XR-A8TG	B
TCGA_TCGA-RC-A6M6	B
TCGA_TCGA-BC-A69H	A
TCGA_TCGA-DD-AAC8	B
TCGA_TCGA-DD-AADJ	A
TCGA_TCGA-2Y-A9H9	A
TCGA_TCGA-ED-A5KG	B
TCGA_TCGA-DD-AACO	A
TCGA_TCGA-G3-A25Z	A
TCGA_TCGA-DD-A4NV	B
TCGA_TCGA-DD-A39X	A
TCGA_TCGA-EP-A2KA	B
TCGA_TCGA-DD-A1EC	B
TCGA_TCGA-DD-AAD3	B
TCGA_TCGA-DD-AACS	B
TCGA_TCGA-BD-A3ER	B
TCGA_TCGA-GJ-A6C0	B
TCGA_TCGA-2Y-A9GS	B
TCGA_TCGA-BC-A8YO	B
TCGA_TCGA-CC-A9FW	B
TCGA_TCGA-CC-A5UD	B
TCGA_TCGA-DD-A119	A
TCGA_TCGA-DD-AACB	A
TCGA_TCGA-FV-A495	A
TCGA_TCGA-DD-A1EH	B
TCGA_TCGA-DD-AAEH	A
TCGA_TCGA-DD-A4NE	B
TCGA_TCGA-DD-AADV	B
TCGA_TCGA-DD-AACX	C
TCGA_TCGA-DD-AACC	B
TCGA_TCGA-G3-A5SK	C
TCGA_TCGA-DD-AACV	C
TCGA_TCGA-CC-5264	B
TCGA_TCGA-G3-A7M7	A
TCGA_TCGA-G3-AAUZ	A
TCGA_TCGA-RC-A7SK	A
TCGA_TCGA-DD-AACI	A
TCGA_TCGA-2V-A95S	B
TCGA_TCGA-DD-A4NH	B
TCGA_TCGA-WX-AA46	C
TCGA_TCGA-2Y-A9H2	A
TCGA_TCGA-DD-AAW3	A
TCGA_TCGA-ED-A82E	A
TCGA_TCGA-DD-A4NP	C
TCGA_TCGA-G3-A6UC	C
TCGA_TCGA-FV-A2QQ	A
TCGA_TCGA-ZP-A9D4	C
TCGA_TCGA-DD-AAE6	A
TCGA_TCGA-DD-AACG	A
TCGA_TCGA-G3-A5SI	C
TCGA_TCGA-ED-A7PY	A
TCGA_TCGA-EP-A2KC	B
TCGA_TCGA-BC-A10X	C
TCGA_TCGA-CC-A7IH	C
TCGA_TCGA-DD-A3A8	C
TCGA_TCGA-DD-AACL	B
TCGA_TCGA-DD-A116	C
TCGA_TCGA-CC-A7IG	A
TCGA_TCGA-DD-AAE9	A
TCGA_TCGA-DD-AAVP	A
TCGA_TCGA-G3-AAV5	A
TCGA_TCGA-G3-A3CG	B
TCGA_TCGA-CC-5260	B
TCGA_TCGA-CC-A7IJ	B
TCGA_TCGA-DD-A4NK	C
TCGA_TCGA-DD-A3A5	A
TCGA_TCGA-NI-A4U2	C
TCGA_TCGA-DD-A4NF	C
TCGA_TCGA-DD-AADI	A
TCGA_TCGA-DD-A4NA	B
TCGA_TCGA-BC-A10T	C
TCGA_TCGA-RC-A7SH	A
TCGA_TCGA-WJ-A86L	A
TCGA_TCGA-DD-AA3A	A
TCGA_TCGA-CC-A7IE	B
TCGA_TCGA-DD-AAVS	B
TCGA_TCGA-DD-AAE7	A
TCGA_TCGA-BC-A3KG	B
TCGA_TCGA-DD-A3A2	C
TCGA_TCGA-DD-AAVR	A
TCGA_TCGA-CC-A7II	A
TCGA_TCGA-DD-AACN	B
TCGA_TCGA-2Y-A9GX	B
TCGA_TCGA-CC-A3MA	A
TCGA_TCGA-DD-AACQ	A
TCGA_TCGA-RC-A7SF	A
TCGA_TCGA-DD-AADW	B
TCGA_TCGA-G3-A3CH	C
TCGA_TCGA-DD-A1EI	B
TCGA_TCGA-ZP-A9CZ	B
TCGA_TCGA-KR-A7K0	A
TCGA_TCGA-BC-A10Y	C
TCGA_TCGA-ED-A8O5	B
TCGA_TCGA-CC-A9FS	A
TCGA_TCGA-UB-A7MB	C
TCGA_TCGA-ED-A627	B
TCGA_TCGA-XR-A8TE	B
TCGA_TCGA-DD-AACF	C
TCGA_TCGA-K7-A5RF	C
TCGA_TCGA-ZP-A9D1	B
TCGA_TCGA-DD-A3A7	A
TCGA_TCGA-DD-AACE	A
TCGA_TCGA-2Y-A9H3	A
TCGA_TCGA-DD-A4NB	C
TCGA_TCGA-EP-A26S	C
TCGA_TCGA-DD-AAVX	C
TCGA_TCGA-ED-A7PZ	A
TCGA_TCGA-LG-A6GG	B
TCGA_TCGA-UB-A7ME	B
TCGA_TCGA-G3-A7M9	B
TCGA_TCGA-DD-AACJ	A
TCGA_TCGA-LG-A9QD	A
TCGA_TCGA-ZS-A9CG	C
TCGA_TCGA-K7-A6G5	B
TCGA_TCGA-DD-AADS	A
TCGA_TCGA-DD-AAW1	C
TCGA_TCGA-DD-A118	A
TCGA_TCGA-DD-AADA	A
TCGA_TCGA-G3-AAV1	C
TCGA_TCGA-O8-A75V	B
TCGA_TCGA-ZP-A9CY	B
TCGA_TCGA-G3-A7M8	A
TCGA_TCGA-DD-AAE0	A
GSE76427_GSM2011285	A
GSE76427_GSM2011286	B
GSE76427_GSM2011287	B
GSE76427_GSM2011288	B
GSE76427_GSM2011289	A
GSE76427_GSM2011290	B
GSE76427_GSM2011291	A
GSE76427_GSM2011292	A
GSE76427_GSM2011293	A
GSE76427_GSM2011294	A
GSE76427_GSM2011295	A
GSE76427_GSM2011296	A
GSE76427_GSM2011297	B
GSE76427_GSM2011298	A
GSE76427_GSM2011299	B
GSE76427_GSM2011300	A
GSE76427_GSM2011301	A
GSE76427_GSM2011302	A
GSE76427_GSM2011303	A
GSE76427_GSM2011304	A
GSE76427_GSM2011305	A
GSE76427_GSM2011306	B
GSE76427_GSM2011307	A
GSE76427_GSM2011308	B
GSE76427_GSM2011309	B
GSE76427_GSM2011310	A
GSE76427_GSM2011311	A
GSE76427_GSM2011312	B
GSE76427_GSM2011313	B
GSE76427_GSM2011314	A
GSE76427_GSM2011315	B
GSE76427_GSM2011316	C
GSE76427_GSM2011317	A
GSE76427_GSM2011318	B
GSE76427_GSM2011319	C
GSE76427_GSM2011320	A
GSE76427_GSM2011321	B
GSE76427_GSM2011322	B
GSE76427_GSM2011323	A
GSE76427_GSM2011324	A
GSE76427_GSM2011325	B
GSE76427_GSM2011326	A
GSE76427_GSM2011327	A
GSE76427_GSM2011328	A
GSE76427_GSM2011329	C
GSE76427_GSM2011330	B
GSE76427_GSM2011331	C
GSE76427_GSM2011332	C
GSE76427_GSM2011333	B
GSE76427_GSM2011334	A
GSE76427_GSM2011335	A
GSE76427_GSM2011336	A
GSE76427_GSM2011337	C
GSE76427_GSM2011338	A
GSE76427_GSM2011339	A
GSE76427_GSM2011340	C
GSE76427_GSM2011341	C
GSE76427_GSM2011342	B
GSE76427_GSM2011343	B
GSE76427_GSM2011344	C
GSE76427_GSM2011345	A
GSE76427_GSM2011346	A
GSE76427_GSM2011347	A
GSE76427_GSM2011348	A
GSE76427_GSM2011349	B
GSE76427_GSM2011350	A
GSE76427_GSM2011351	B
GSE76427_GSM2011352	A
GSE76427_GSM2011353	B
GSE76427_GSM2011354	C
GSE76427_GSM2011355	B
GSE76427_GSM2011356	B
GSE76427_GSM2011357	B
GSE76427_GSM2011358	B
GSE76427_GSM2011359	A
GSE76427_GSM2011360	B
GSE76427_GSM2011361	B
GSE76427_GSM2011362	B
GSE76427_GSM2011363	A
GSE76427_GSM2011364	B
GSE76427_GSM2011365	A
GSE76427_GSM2011366	B
GSE76427_GSM2011367	B
GSE76427_GSM2011368	B
GSE76427_GSM2011369	C
GSE76427_GSM2011370	B
GSE76427_GSM2011371	A
GSE76427_GSM2011372	A
GSE76427_GSM2011373	B
GSE76427_GSM2011374	B
GSE76427_GSM2011375	C
GSE76427_GSM2011376	A
GSE76427_GSM2011377	B
GSE76427_GSM2011378	B
GSE76427_GSM2011379	B
GSE76427_GSM2011380	B
GSE76427_GSM2011381	C
GSE76427_GSM2011382	B
GSE76427_GSM2011383	B
GSE76427_GSM2011384	A
GSE76427_GSM2011385	B
GSE76427_GSM2011386	A
GSE76427_GSM2011387	A
GSE76427_GSM2011388	A
GSE76427_GSM2011389	B
GSE76427_GSM2011390	B
GSE76427_GSM2011391	A
GSE76427_GSM2011392	A
GSE76427_GSM2011393	A
GSE76427_GSM2011394	B
GSE76427_GSM2011395	B
GSE76427_GSM2011396	B
GSE76427_GSM2011397	C
GSE76427_GSM2011398	B
GSE76427_GSM2011399	C
GSE76427_GSM2011400	A
GSE76427_GSM2011401	A
GSE76427_GSM2011402	B
GSE76427_GSM2011403	B
GSE76427_GSM2011404	A
GSE76427_GSM2011405	A
GSE76427_GSM2011406	B
GSE76427_GSM2011407	A
GSE76427_GSM2011408	B
GSE76427_GSM2011409	B
GSE76427_GSM2011410	A
GSE76427_GSM2011411	A
GSE76427_GSM2011412	B
GSE76427_GSM2011413	B
GSE76427_GSM2011414	B
GSE76427_GSM2011415	A
GSE76427_GSM2011416	B
GSE76427_GSM2011417	A
GSE76427_GSM2011418	A
GSE76427_GSM2011419	A
GSE76427_GSM2011420	A
GSE76427_GSM2011421	A
GSE76427_GSM2011422	A
GSE76427_GSM2011423	A
GSE76427_GSM2011424	C
GSE76427_GSM2011425	B
GSE76427_GSM2011426	C
GSE76427_GSM2011427	C
GSE76427_GSM2011428	C
GSE76427_GSM2011429	B
GSE76427_GSM2011430	A
GSE76427_GSM2011431	C
GSE76427_GSM2011432	C
GSE76427_GSM2011433	C
GSE76427_GSM2011434	C
GSE76427_GSM2011435	C
GSE76427_GSM2011436	A
GSE76427_GSM2011437	C
GSE76427_GSM2011438	B
GSE76427_GSM2011439	C
GSE76427_GSM2011440	C
GSE76427_GSM2011441	C
GSE76427_GSM2011442	A
GSE76427_GSM2011443	A
GSE76427_GSM2011444	B
GSE76427_GSM2011445	C
GSE76427_GSM2011446	A
GSE76427_GSM2011447	B
GSE76427_GSM2011448	C
GSE76427_GSM2011449	C
GSE76427_GSM2011450	C
GSE76427_GSM2011451	C
