# Supplementary material for: A scoring model based on ferroptosis genes for prognosis and immunotherapy response prediction and tumor microenvironment evaluation in liver hepatocellular carcinoma
Source: Aging (Albany NY). 2021 Nov 28;13(22):24866–81. doi: 10.18632/aging.203721 (PMC8660622; doi:10.18632/aging.203721)
Supplement: Supplementary Table 4 [file aging-13-203721-s004.xls]

## Sheet: Sheet1
Supplementary Table 4. The 1039 differential genes obtained in three subtypes of LIHC cases.
LPCAT3
LIPA
M6PR
RP2
PATL1
TXNDC5
GTF2A1
DNAJC14
TMF1
TBK1
TPP1
PIK3C2A
MFSD1
PDCD6IP
PDE12
KPNA3
PBRM1
RFFL
ATM
FUBP3
ABCE1
CCNK
EPB41
OTUD4
RC3H2
KLF3
UVRAG
CSNK1A1
GOLGA4
ATP6V1A
MOSPD2
RNF111
ZNF654
UHRF1BP1L
MAN1A1
UBQLN1
STT3B
ATP6V1B2
ABCA1
MFAP3
SLC11A2
SNAP23
SEC24C
TWF1
XRN2
EAF1
CUL3
UBA3
YME1L1
VRK2
REEP3
ACSL4
BACH1
TLR4
RAB43
PXK
TWISTNB
KBTBD4
EEA1
RDX
ESF1
ZC3HAV1
DIS3
ATRX
NUP153
MEF2A
ARFGEF2
AVL9
MTMR12
PRKAR2A
TBC1D14
TNFAIP3
CASC4
KTN1
STAM2
ING3
TGFBR2
UBR1
UBE2V1
COG5
PIKFYVE
TGOLN2
NEK4
EIF4H
ZCCHC2
WDR36
YTHDF3
SLMAP
BNIP2
ROCK1
G3BP2
AQR
IREB2
CDC40
SETX
NT5C2
PHF20L1
RAB5A
MGAT2
ZBTB1
RNF13
KBTBD8
CUL2
AZI2
IDH3A
SMC1A
C5orf24
PGAM1
LRCH1
SRPK2
PSMC2
EXOC5
STAG2
ZCCHC4
TAOK3
SCYL2
FAM114A2
RNF6
AKAP11
USP34
MIER3
NPAT
PLEKHA3
OAS3
PRKD3
CUL5
STAG1
TRUB1
NSUN3
FKBP15
TMTC3
NEK9
TMOD3
NCOA2
RAP1B
CDC73
CASP8AP2
DOCK7
ZNF655
ATE1
RCHY1
SNX6
UTP20
ANKRD40
BNIP3L
USO1
ARL2BP
LIMS1
TRIM6
NCK1
C12orf49
SP2
BRMS1L
MTPN
MFN1
PCSK7
NRBF2
SAMD8
RASA1
NUP160
NFKB1
PHACTR2
ARL13B
FRS2
CSNK1G3
MPHOSPH9
BMPR2
SMG6
HNRNPH2
ANKIB1
HFE
TMEM209
TBC1D8B
MFHAS1
WDR47
RALBP1
BAZ2A
SNX2
CD163
BECN1
ARHGAP12
ARPP19
NGLY1
PANK3
CCDC117
VPS37A
NEK7
YAP1
BZW1
TNFRSF10A
RBM41
IPPK
TTC33
SAMD9
MMD
NCOA1
TPR
POM121
TIMM23B
SMARCC2
DDX6
VPS4B
NECAP1
TMEM38B
MIER1
SLC25A40
WRN
SASH1
DENND4A
BAZ1B
GIGYF2
ADAM17
PARP4
PNMA1
PHF6
ARPC2
TOP1
USP9X
GANAB
TMEM184B
COMMD8
UBE2K
SETD1B
SUCLA2
ASNSD1
CLIP1
GDE1
PARP11
GNAQ
EIF4G1
SNX13
NUS1
NCBP2
SLC25A43
UBQLN2
ZNF92
NHLRC3
ZBTB33
RFK
ETV5
GOPC
ANXA5
VGLL4
USP24
C18orf25
DIABLO
RSF1
UGT1A6
NOMO2
DLG5
CUL4A
CCL20
BCAP29
PTCD3
EPC2
SMC6
LASP1
SLAMF8
USP10
STT3A
USP46
PARP9
DPP3
FAM114A1
CCNT1
ZNF318
YWHAZ
BTAF1
CSTF2T
WDR37
ANKRD13A
IL4I1
MPZL1
CD37
RAB3GAP1
SLC37A1
LILRA1
FBXO3
PIBF1
DDHD2
SH3BP1
RASSF3
LPGAT1
GPD1L
STX6
USP37
TNFRSF21
PAK1
MAPRE1
LIMK2
VNN2
RIPK2
MICALL1
ENAH
PLCB1
VPS37C
SLC31A1
SLC31A2
ITGB5
PLXNA1
LIMK1
MARCKS
TRAF5
HKDC1
EMILIN2
CARD10
CD5
MERTK
SLC2A6
P2RX4
CTSC
PLEKHG2
LARP4
MED15
SLC39A1
IER3
ABCC10
ALDH18A1
CKAP4
PDIA3
TOP2A
HOMER1
GLS
NCF4
NPAS2
ARHGEF2
IL15RA
TMEM164
PLXNA3
C15orf39
SLC39A10
SLAMF1
RAB7B
NCAPG
GPR160
PRKCD
DLGAP5
CASP4
VDAC1
SEL1L3
UBE2Q2
CD3E
STIP1
PTGFRN
ARHGEF3
ARPC1B
ADM2
HIC2
MCM4
KATNA1
CEP55
STXBP5
GLRX3
BEND3
VOPP1
TPM4
TOMM40L
ATP1A1
CLSTN1
SMG5
IKBKE
SAE1
ADA
HAPLN3
XRCC6
MTHFD1L
KAT2B
SLC22A15
SOX9
CDC25B
ATP13A2
TMEM201
GLTP
CSNK1E
CTLA4
IL27RA
TRIM31
KDELR3
KIAA0100
SLC12A9
CLGN
SFT2D1
ADSL
FAM169A
CD2
TTLL4
MED10
IFNGR2
BLM
LAPTM4B
MPV17
MSC
RNF24
RCC2
CMTM7
IQGAP2
XPC
MIR155HG
PANX1
SCAPER
DNAJC5
PHF5A
EIF2S2
FAM8A1
GOLM1
RNF128
HINT2
ST6GALNAC4
UBD
RGS19
TECPR1
HSPA4
TOR2A
CNOT3
UCK2
CXCR3
CFL1
G6PD
TPX2
EGLN3
MICAL1
MMP9
PNPO
SLC7A1
CD276
TRIP13
L2HGDH
GPR68
TRNP1
CENPF
TCF3
CCNA2
DDI2
SMOX
SMARCB1
TMBIM6
ANXA2
TTK
MFSD6
TRPC1
ABHD6
CREBL2
CORO1B
DCUN1D5
TRAPPC4
TMC7
CDCA8
SLC16A1
IMPDH1
CDCA4
IER5
NAP1L1
CD3D
ZYX
HSP90B1
PPA1
CDC25A
IL2RG
PYGB
LMNB2
ANAPC7
ACTG1
UNC119
PEX11G
JAK3
CD52
DEPDC1B
ATIC
TLE3
TTPA
DEF6
DMD
SHKBP1
PHF8
SALL2
GRK6
PRR11
TRIM35
NACC1
TBC1D22A
SLC25A13
LRRC1
CLIC1
GATM
TREM2
TUBA1A
SEC61A1
CCDC25
GCLC
GPRIN1
SLC39A8
DLGAP4
PHC2
METTL9
PGBD1
IGF2BP2
ATXN7L1
LPCAT1
INSIG2
EPS15L1
LGALS9
SNRPA1
DHRS4L2
PACS1
RGS10
ZYG11B
SULT1C2
PSTPIP1
HDAC1
ASNS
DCXR
CCDC97
ARID3A
CCDC134
EXO1
ZNF335
CRBN
ZDHHC13
SNAI3
F8
TAGLN2
GRAMD1A
ITM2C
HMGA1
IRS1
BAK1
SLC1A5
NIPSNAP3A
KCTD17
HJURP
CYB561D1
CDK7
OSBPL10
CCNB2
CEP72
MSI2
CTHRC1
PACS2
NKIRAS1
AACS
CDKN3
TEAD2
TSPAN3
ZIC2
STK11IP
RCE1
SUB1
MED22
FUT4
SIRPG
KIFC1
OIT3
S100A4
ILF2
PLK1
HSDL2
ENPEP
EXT1
CENPO
ARHGAP22
PINK1
MYLK
ODC1
CA12
RBBP9
SFI1
TLR5
SNURF
CHD3
SMARCA2
TCOF1
RABIF
SF3B4
MMP11
TPD52L2
SPAG5
UBE2L3
KLHDC1
CDC14B
FHOD1
ETFDH
COX6B1
DUSP12
SLC10A3
SPHK1
SMAGP
HAGH
COPZ1
SPC25
TMEM192
RRN3
UGT1A4
DNAJB11
SOX4
TIAM2
PDCL3
RELB
ATP11C
TNIK
MACROD1
TTC13
SCRIB
ROMO1
FBLIM1
NFKBIE
ZNF618
CDC6
NDC80
PPP1CA
ACSS1
SLC35E4
HSD17B4
BCKDHB
RFC4
STK39
AURKA
FHDC1
EEF1G
TRPM2
NCR3
ACBD4
FAIM
ELF3
ACADM
ENTPD6
CFL2
CYBA
DHRS7
TMEM51
RRBP1
KLHL2
ELOVL7
CMTM3
CCNB1
CCNF
KRT23
DENND2D
ZNF680
HDAC7
PHF19
ARMC5
FAS
EIF3K
SH2D4A
C8orf33
ACAD11
TACC3
PDCD1
ASB6
RCAN3
EIF3D
CDC42EP1
DPP4
A1CF
PPARA
PDCD6
RBM3
RNF125
NDRG3
ARPC3
NFKB2
VNN3
DNAJC18
TEC
LAT2
DRG1
KIAA1522
SLC27A5
CAPG
HMGN1
PSMA4
PROX1
CENPA
WDR62
BATF
NEK2
PAPLN
E2F2
FAM53B
CDCA5
ARRB2
DTNBP1
TTC36
FLOT1
ACP5
ENPP1
DYNLL1
NUF2
SKA1
PDE4A
PIK3R1
PSRC1
BICC1
CHMP2A
CHMP4C
TBC1D10C
RHOG
THOC5
GIT1
C16orf58
TMSB4X
ALAS1
PCYOX1
SH3BGRL2
DAAM2
SOBP
RAD54L2
BCKDHA
CCDC127
SERPINE2
LZTS2
AP4M1
TNRC6A
AKR1B15
ZMAT1
ZKSCAN1
APOC4
UBE2T
SMARCA4
NT5DC1
MYO1B
FHL3
DAAM1
BID
STBD1
DHRS4L1
BCR
RAP1GDS1
HIBADH
CAPN10
FCHO1
MCRS1
STARD13
RPS19
FUNDC1
VASP
UGT1A3
HOXD1
CCDC80
ARF1
MARCKSL1
FKBP1A
CXCL16
CPE
AFF3
GPR146
C2orf27A
RAB33A
MBOAT7
TMED9
CNTROB
BLVRA
LZTFL1
FBXO10
BTG1
TRIM71
PCSK9
ACSS3
SERPINH1
PIF1
SOCS1
BAIAP2L1
SOD1
HAAO
TC2N
C1QBP
GGT1
SYNGR2
ZSCAN5A
PHLDA2
ARHGEF1
PLEKHO1
TGFB1
RORA
MAPKAPK2
RAP1GAP
THAP10
CHST10
KIF2C
TRABD
SEPSECS
PLCB3
DTX2
SSH3
NOL7
RPL18
LYPD1
CSTB
GBGT1
BFSP2
GBP2
PLD1
BSDC1
CD63
PSD3
GADD45G
MRPS12
THSD1
DYNLT1
AMACR
TPMT
SH3BP4
PRELID1
PARP3
GFOD1
MPDZ
SLC5A6
TYMP
STMN1
MAL2
CHN2
SNHG1
HIGD2A
RPS15
PDLIM7
PAN2
ABHD14B
SLC12A8
LGI2
TRIM2
THNSL1
AK3
PA2G4
EEF1E1
ACSL1
FAU
HGD
SLC44A3
CDKN2D
NEK3
TYRO3
ALG3
KLHDC9
C9orf72
ZNF239
VWF
TMEM102
MAPK13
BLVRB
SEC14L2
GPHN
NUP43
LONP2
CHAF1B
CDC20
ARHGEF5
FAAH
FAM110A
DERA
CTSK
FKBP10
PEX11A
KRCC1
CDCA3
PTOV1
NDUFS6
RANGAP1
ACSL5
AOX1
MYB
CTSO
CD24
ALDOA
BRSK1
TCEAL1
SUOX
MIDN
FAM118A
FOXO1
RTKN
EZR
RPS9
TMEM216
DMRTA1
SH3BGRL3
ECHDC2
CRYZ
ADI1
DAZAP1
ANKRD13D
ARNTL2
B3GALT4
SAMD10
SLC25A37
SORL1
ZIC5
UBE2I
TMEM44
CNIH4
FANCG
CIDEB
SAAL1
NMT2
THUMPD2
RINL
LTB
GLUL
ASF1B
COBLL1
NOP56
ARMC7
GPC3
RAVER2
LIPG
FLOT2
YPEL4
GCDH
NT5DC2
CDS1
BIRC5
ARPC5L
PHLPP1
TMEM171
CCDC88B
BSG
HOMER3
SNRPD1
NOSIP
PLEKHA4
GSTZ1
AKR7A3
CRTC1
CD151
SOX12
PYCR2
DYNC1I1
CTDSPL
SH2D2A
QSOX1
TRIM47
MFSD10
WDYHV1
PPIA
TGIF2
CLDN14
LGR5
LGALS3
SNRPG
ADAL
MFSD5
ZDHHC24
AADAC
OTX1
BCL7C
TRAIP
RBP5
TGFBR3
TJP3
ANXA11
TSPAN17
FAM24B
CLDN23
TAT
ATG4B
RPL24
C1S
ZFP82
IER5L
TK2
MRPL18
SFXN1
TUBA4A
RPLP2
RUSC1
CCDC137
STARD10
MRO
UBE2C
VPS72
AP1G2
RPP30
METRNL
METTL5
TAPT1
ANKRD24
CD7
CERCAM
TRIM28
UBL4A
CPXM1
DHRS1
TMEM47
GAS2
ABCG2
RPL37A
TMC6
DHTKD1
GLYAT
RPL17
RPL38
OLFML2A
C11orf80
KLHDC10
IGSF1
CHMP4B
NUDT6
FZD2
AURKB
GAS5
LGALS2
RPS16
SNRPB
PROC
C8orf76
A2M
TINAG
WSCD1
MOGAT2
VIL1
LAMA3
PUS1
PDK2
CENPM
TAX1BP3
FXYD5
OAF
SLC6A13
KLF12
AQP11
KCNMB3
ABCB11
ACADSB
PSMC4
SOD3
PEG10
TBC1D2
STAT4
BHMT2
SENP3
SYNGR3
HTR2B
NDUFA4L2
SGSM3
CPT2
ATF4
NRIP2
MAOA
FGFR2
TIGD1
