# Supplementary material for: A scoring model based on ferroptosis genes for prognosis and immunotherapy response prediction and tumor microenvironment evaluation in liver hepatocellular carcinoma
Source: Aging (Albany NY). 2021 Nov 28;13(22):24866–81. doi: 10.18632/aging.203721 (PMC8660622; doi:10.18632/aging.203721)
Supplement: Supplementary Table 5 [file aging-13-203721-s005.xls]

## Sheet: Sheet1
Supplementary Table 5. The LIHC patients were classified into three gene subtypes （A, B and C） based on the cluster analysis of prognostic genes.
ID	GeneCluster
TCGA_TCGA-DD-AAE4	A
TCGA_TCGA-CC-A3M9	B
TCGA_TCGA-DD-A4NI	A
TCGA_TCGA-G3-AAV3	C
TCGA_TCGA-UB-A7MA	B
TCGA_TCGA-UB-A7MF	C
TCGA_TCGA-BC-A112	B
TCGA_TCGA-BC-A10U	C
TCGA_TCGA-BC-A5W4	A
TCGA_TCGA-FV-A3I1	B
TCGA_TCGA-CC-A123	C
TCGA_TCGA-WQ-A9G7	B
TCGA_TCGA-ED-A66X	B
TCGA_TCGA-DD-A1EK	A
TCGA_TCGA-DD-AADM	A
TCGA_TCGA-MR-A8JO	A
TCGA_TCGA-QA-A7B7	C
TCGA_TCGA-CC-A8HT	B
TCGA_TCGA-FV-A4ZP	C
TCGA_TCGA-DD-A4NJ	C
TCGA_TCGA-CC-5258	B
TCGA_TCGA-EP-A2KB	C
TCGA_TCGA-G3-A25X	B
TCGA_TCGA-DD-AAD1	B
TCGA_TCGA-G3-A3CK	A
TCGA_TCGA-DD-AACA	C
TCGA_TCGA-5C-A9VH	C
TCGA_TCGA-FV-A23B	C
TCGA_TCGA-DD-AADR	A
TCGA_TCGA-DD-A4NQ	B
TCGA_TCGA-G3-A5SM	C
TCGA_TCGA-MI-A75E	A
TCGA_TCGA-DD-A11D	A
TCGA_TCGA-CC-5262	C
TCGA_TCGA-2Y-A9GY	B
TCGA_TCGA-ES-A2HT	A
TCGA_TCGA-DD-AAW0	C
TCGA_TCGA-G3-A3CI	A
TCGA_TCGA-DD-AAVV	C
TCGA_TCGA-DD-A39Y	B
TCGA_TCGA-DD-A1EB	A
TCGA_TCGA-DD-AAD6	A
TCGA_TCGA-ED-A4XI	A
TCGA_TCGA-HP-A5MZ	A
TCGA_TCGA-DD-AAVU	C
TCGA_TCGA-DD-A4NO	A
TCGA_TCGA-BC-A10W	B
TCGA_TCGA-LG-A9QC	A
TCGA_TCGA-DD-A11C	C
TCGA_TCGA-DD-AADB	B
TCGA_TCGA-DD-AAVZ	C
TCGA_TCGA-BC-A216	C
TCGA_TCGA-DD-A1EF	B
TCGA_TCGA-DD-AADL	C
TCGA_TCGA-KR-A7K8	C
TCGA_TCGA-ED-A7PX	B
TCGA_TCGA-DD-AADK	C
TCGA_TCGA-BW-A5NO	C
TCGA_TCGA-DD-A39W	A
TCGA_TCGA-GJ-A9DB	C
TCGA_TCGA-DD-A1EA	C
TCGA_TCGA-UB-A7MD	C
TCGA_TCGA-ES-A2HS	A
TCGA_TCGA-G3-A3CJ	A
TCGA_TCGA-FV-A3R2	C
TCGA_TCGA-BW-A5NQ	B
TCGA_TCGA-2Y-A9GZ	A
TCGA_TCGA-4R-AA8I	C
TCGA_TCGA-DD-A4NG	A
TCGA_TCGA-RC-A6M5	A
TCGA_TCGA-2Y-A9H0	C
TCGA_TCGA-DD-A11B	A
TCGA_TCGA-G3-A25V	A
TCGA_TCGA-5R-AA1C	A
TCGA_TCGA-ED-A8O6	B
TCGA_TCGA-DD-AADD	C
TCGA_TCGA-BC-A10S	A
TCGA_TCGA-CC-A9FV	C
TCGA_TCGA-DD-AAEB	A
TCGA_TCGA-WX-AA44	B
TCGA_TCGA-PD-A5DF	C
TCGA_TCGA-YA-A8S7	B
TCGA_TCGA-5R-AA1D	A
TCGA_TCGA-DD-AACH	B
TCGA_TCGA-CC-A8HV	B
TCGA_TCGA-BW-A5NP	B
TCGA_TCGA-G3-AAV0	A
TCGA_TCGA-DD-AAED	C
TCGA_TCGA-DD-A73F	C
TCGA_TCGA-DD-A4NN	B
TCGA_TCGA-DD-AAEI	A
TCGA_TCGA-UB-AA0V	A
TCGA_TCGA-DD-AADO	C
TCGA_TCGA-DD-AAVY	A
TCGA_TCGA-FV-A3R3	A
TCGA_TCGA-DD-A4NS	C
TCGA_TCGA-MI-A75H	A
TCGA_TCGA-UB-A7MC	C
TCGA_TCGA-FV-A4ZQ	B
TCGA_TCGA-DD-AAEG	C
TCGA_TCGA-DD-AAD5	B
TCGA_TCGA-K7-A5RG	C
TCGA_TCGA-XR-A8TD	C
TCGA_TCGA-DD-AACY	A
TCGA_TCGA-CC-A9FU	B
TCGA_TCGA-KR-A7K7	C
TCGA_TCGA-G3-A25Y	B
TCGA_TCGA-K7-AAU7	B
TCGA_TCGA-BC-A3KF	C
TCGA_TCGA-BC-A10Z	C
TCGA_TCGA-UB-AA0U	C
TCGA_TCGA-DD-AAEE	A
TCGA_TCGA-ZP-A9D0	A
TCGA_TCGA-DD-A1EG	C
TCGA_TCGA-CC-A7IL	A
TCGA_TCGA-RC-A6M4	A
TCGA_TCGA-ED-A7XP	C
TCGA_TCGA-2Y-A9HA	C
TCGA_TCGA-DD-AAE2	A
TCGA_TCGA-DD-AADF	A
TCGA_TCGA-DD-AACW	C
TCGA_TCGA-MI-A75I	C
TCGA_TCGA-FV-A3I0	B
TCGA_TCGA-2Y-A9H1	A
TCGA_TCGA-CC-A8HU	B
TCGA_TCGA-DD-AAD2	C
TCGA_TCGA-BC-A10R	A
TCGA_TCGA-G3-A5SL	A
TCGA_TCGA-CC-A1HT	B
TCGA_TCGA-2Y-A9GV	A
TCGA_TCGA-ED-A7XO	C
TCGA_TCGA-CC-A5UC	B
TCGA_TCGA-DD-AAVQ	C
TCGA_TCGA-BD-A3EP	C
TCGA_TCGA-DD-A39V	A
TCGA_TCGA-DD-A3A1	C
TCGA_TCGA-DD-A4NR	B
TCGA_TCGA-DD-AAC9	A
TCGA_TCGA-CC-5259	A
TCGA_TCGA-DD-AADC	B
TCGA_TCGA-ZS-A9CF	C
TCGA_TCGA-NI-A8LF	A
TCGA_TCGA-DD-A39Z	A
TCGA_TCGA-G3-A7M5	A
TCGA_TCGA-MI-A75G	A
TCGA_TCGA-CC-A7IK	C
TCGA_TCGA-G3-A5SJ	B
TCGA_TCGA-ZS-A9CE	A
TCGA_TCGA-DD-A73B	C
TCGA_TCGA-RC-A7SB	A
TCGA_TCGA-DD-AADN	C
TCGA_TCGA-CC-A5UE	B
TCGA_TCGA-DD-AACZ	B
TCGA_TCGA-DD-A3A3	A
TCGA_TCGA-2Y-A9H8	C
TCGA_TCGA-DD-AAEK	C
TCGA_TCGA-DD-A4ND	C
TCGA_TCGA-2Y-A9H7	C
TCGA_TCGA-RC-A7S9	C
TCGA_TCGA-G3-A25S	C
TCGA_TCGA-BC-A217	C
TCGA_TCGA-DD-AAW2	A
TCGA_TCGA-2Y-A9H6	A
TCGA_TCGA-2Y-A9GW	C
TCGA_TCGA-DD-A73D	A
TCGA_TCGA-DD-A115	C
TCGA_TCGA-XR-A8TF	A
TCGA_TCGA-DD-AADU	A
TCGA_TCGA-DD-AAE1	C
TCGA_TCGA-2Y-A9HB	A
TCGA_TCGA-BD-A2L6	A
TCGA_TCGA-DD-A3A9	C
TCGA_TCGA-KR-A7K2	A
TCGA_TCGA-ED-A66Y	B
TCGA_TCGA-DD-AAE3	A
TCGA_TCGA-G3-AAV6	B
TCGA_TCGA-ED-A97K	B
TCGA_TCGA-DD-AAVW	C
TCGA_TCGA-EP-A3RK	C
TCGA_TCGA-FV-A496	A
TCGA_TCGA-CC-A3MB	B
TCGA_TCGA-CC-A7IF	A
TCGA_TCGA-ZS-A9CD	A
TCGA_TCGA-G3-A7M6	B
TCGA_TCGA-DD-A1ED	A
TCGA_TCGA-EP-A12J	A
TCGA_TCGA-DD-A1EJ	B
TCGA_TCGA-G3-AAV2	A
TCGA_TCGA-DD-AADY	C
TCGA_TCGA-CC-5263	B
TCGA_TCGA-DD-AADP	C
TCGA_TCGA-BC-A69I	A
TCGA_TCGA-5C-A9VG	C
TCGA_TCGA-DD-A1EE	C
TCGA_TCGA-BC-A110	A
TCGA_TCGA-GJ-A3OU	B
TCGA_TCGA-G3-A25U	A
TCGA_TCGA-DD-A4NL	A
TCGA_TCGA-BC-A10Q	B
TCGA_TCGA-2Y-A9GU	A
TCGA_TCGA-ZP-A9CV	C
TCGA_TCGA-DD-A113	C
TCGA_TCGA-2Y-A9GT	A
TCGA_TCGA-CC-A3MC	C
TCGA_TCGA-DD-A73A	A
TCGA_TCGA-DD-AADG	A
TCGA_TCGA-FV-A2QR	C
TCGA_TCGA-G3-AAV7	B
TCGA_TCGA-2Y-A9H4	A
TCGA_TCGA-3K-AAZ8	A
TCGA_TCGA-CC-5261	B
TCGA_TCGA-ZP-A9D2	B
TCGA_TCGA-2Y-A9H5	C
TCGA_TCGA-G3-A25T	B
TCGA_TCGA-DD-AAEA	C
TCGA_TCGA-RG-A7D4	C
TCGA_TCGA-DD-AACD	A
TCGA_TCGA-DD-AAD8	C
TCGA_TCGA-5R-AAAM	A
TCGA_TCGA-EP-A3JL	C
TCGA_TCGA-DD-A73G	A
TCGA_TCGA-G3-AAV4	A
TCGA_TCGA-ED-A459	C
TCGA_TCGA-DD-A73C	A
TCGA_TCGA-MR-A520	A
TCGA_TCGA-RC-A6M3	B
TCGA_TCGA-DD-AACU	C
TCGA_TCGA-WX-AA47	A
TCGA_TCGA-DD-A3A4	A
TCGA_TCGA-DD-AADQ	A
TCGA_TCGA-CC-A8HS	B
TCGA_TCGA-DD-A1EL	B
TCGA_TCGA-WQ-AB4B	A
TCGA_TCGA-DD-A11A	C
TCGA_TCGA-DD-AAD0	C
TCGA_TCGA-DD-A3A6	A
TCGA_TCGA-DD-A114	B
TCGA_TCGA-5C-AAPD	B
TCGA_TCGA-HP-A5N0	A
TCGA_TCGA-T1-A6J8	A
TCGA_TCGA-XR-A8TC	C
TCGA_TCGA-DD-AACK	C
TCGA_TCGA-MI-A75C	C
TCGA_TCGA-DD-AACP	B
TCGA_TCGA-DD-AACT	A
TCGA_TCGA-DD-A73E	A
TCGA_TCGA-BC-4072	B
TCGA_TCGA-BC-4073	B
TCGA_TCGA-XR-A8TG	C
TCGA_TCGA-RC-A6M6	B
TCGA_TCGA-BC-A69H	B
TCGA_TCGA-DD-AAC8	C
TCGA_TCGA-DD-AADJ	A
TCGA_TCGA-2Y-A9H9	A
TCGA_TCGA-ED-A5KG	B
TCGA_TCGA-DD-AACO	A
TCGA_TCGA-G3-A25Z	A
TCGA_TCGA-DD-A4NV	A
TCGA_TCGA-DD-A39X	C
TCGA_TCGA-EP-A2KA	C
TCGA_TCGA-DD-A1EC	B
TCGA_TCGA-DD-AAD3	C
TCGA_TCGA-DD-AACS	C
TCGA_TCGA-BD-A3ER	A
TCGA_TCGA-GJ-A6C0	C
TCGA_TCGA-2Y-A9GS	B
TCGA_TCGA-BC-A8YO	B
TCGA_TCGA-CC-A9FW	B
TCGA_TCGA-CC-A5UD	B
TCGA_TCGA-DD-A119	A
TCGA_TCGA-DD-AACB	C
TCGA_TCGA-FV-A495	C
TCGA_TCGA-DD-A1EH	B
TCGA_TCGA-DD-AAEH	A
TCGA_TCGA-DD-A4NE	C
TCGA_TCGA-DD-AADV	C
TCGA_TCGA-DD-AACX	C
TCGA_TCGA-DD-AACC	C
TCGA_TCGA-G3-A5SK	A
TCGA_TCGA-DD-AACV	C
TCGA_TCGA-CC-5264	B
TCGA_TCGA-G3-A7M7	A
TCGA_TCGA-G3-AAUZ	A
TCGA_TCGA-RC-A7SK	A
TCGA_TCGA-DD-AACI	C
TCGA_TCGA-2V-A95S	B
TCGA_TCGA-DD-A4NH	B
TCGA_TCGA-WX-AA46	A
TCGA_TCGA-2Y-A9H2	B
TCGA_TCGA-DD-AAW3	A
TCGA_TCGA-ED-A82E	B
TCGA_TCGA-DD-A4NP	A
TCGA_TCGA-G3-A6UC	A
TCGA_TCGA-FV-A2QQ	C
TCGA_TCGA-ZP-A9D4	A
TCGA_TCGA-DD-AAE6	C
TCGA_TCGA-DD-AACG	C
TCGA_TCGA-G3-A5SI	C
TCGA_TCGA-ED-A7PY	C
TCGA_TCGA-EP-A2KC	C
TCGA_TCGA-BC-A10X	A
TCGA_TCGA-CC-A7IH	A
TCGA_TCGA-DD-A3A8	A
TCGA_TCGA-DD-AACL	B
TCGA_TCGA-DD-A116	A
TCGA_TCGA-CC-A7IG	B
TCGA_TCGA-DD-AAE9	A
TCGA_TCGA-DD-AAVP	A
TCGA_TCGA-G3-AAV5	C
TCGA_TCGA-G3-A3CG	A
TCGA_TCGA-CC-5260	B
TCGA_TCGA-CC-A7IJ	B
TCGA_TCGA-DD-A4NK	A
TCGA_TCGA-DD-A3A5	A
TCGA_TCGA-NI-A4U2	A
TCGA_TCGA-DD-A4NF	A
TCGA_TCGA-DD-AADI	C
TCGA_TCGA-DD-A4NA	B
TCGA_TCGA-BC-A10T	A
TCGA_TCGA-RC-A7SH	C
TCGA_TCGA-WJ-A86L	C
TCGA_TCGA-DD-AA3A	B
TCGA_TCGA-CC-A7IE	B
TCGA_TCGA-DD-AAVS	C
TCGA_TCGA-DD-AAE7	A
TCGA_TCGA-BC-A3KG	B
TCGA_TCGA-DD-A3A2	A
TCGA_TCGA-DD-AAVR	A
TCGA_TCGA-CC-A7II	B
TCGA_TCGA-DD-AACN	C
TCGA_TCGA-2Y-A9GX	C
TCGA_TCGA-CC-A3MA	B
TCGA_TCGA-DD-AACQ	A
TCGA_TCGA-RC-A7SF	A
TCGA_TCGA-DD-AADW	B
TCGA_TCGA-G3-A3CH	A
TCGA_TCGA-DD-A1EI	B
TCGA_TCGA-ZP-A9CZ	C
TCGA_TCGA-KR-A7K0	A
TCGA_TCGA-BC-A10Y	C
TCGA_TCGA-ED-A8O5	C
TCGA_TCGA-CC-A9FS	A
TCGA_TCGA-UB-A7MB	C
TCGA_TCGA-ED-A627	C
TCGA_TCGA-XR-A8TE	A
TCGA_TCGA-DD-AACF	C
TCGA_TCGA-K7-A5RF	A
TCGA_TCGA-ZP-A9D1	C
TCGA_TCGA-DD-A3A7	C
TCGA_TCGA-DD-AACE	A
TCGA_TCGA-2Y-A9H3	A
TCGA_TCGA-DD-A4NB	A
TCGA_TCGA-EP-A26S	A
TCGA_TCGA-DD-AAVX	A
TCGA_TCGA-ED-A7PZ	C
TCGA_TCGA-LG-A6GG	C
TCGA_TCGA-UB-A7ME	C
TCGA_TCGA-G3-A7M9	B
TCGA_TCGA-DD-AACJ	A
TCGA_TCGA-LG-A9QD	A
TCGA_TCGA-ZS-A9CG	A
TCGA_TCGA-K7-A6G5	A
TCGA_TCGA-DD-AADS	A
TCGA_TCGA-DD-AAW1	A
TCGA_TCGA-DD-A118	C
TCGA_TCGA-DD-AADA	A
TCGA_TCGA-G3-AAV1	C
TCGA_TCGA-O8-A75V	C
TCGA_TCGA-ZP-A9CY	A
TCGA_TCGA-G3-A7M8	A
TCGA_TCGA-DD-AAE0	B
GSE76427_GSM2011285	C
GSE76427_GSM2011286	C
GSE76427_GSM2011287	C
GSE76427_GSM2011288	C
GSE76427_GSM2011289	C
GSE76427_GSM2011290	B
GSE76427_GSM2011291	B
GSE76427_GSM2011292	C
GSE76427_GSM2011293	C
GSE76427_GSM2011294	C
GSE76427_GSM2011295	C
GSE76427_GSM2011296	C
GSE76427_GSM2011297	C
GSE76427_GSM2011298	C
GSE76427_GSM2011299	C
GSE76427_GSM2011300	C
GSE76427_GSM2011301	A
GSE76427_GSM2011302	C
GSE76427_GSM2011303	A
GSE76427_GSM2011304	C
GSE76427_GSM2011305	B
GSE76427_GSM2011306	C
GSE76427_GSM2011307	A
GSE76427_GSM2011308	A
GSE76427_GSM2011309	C
GSE76427_GSM2011310	B
GSE76427_GSM2011311	C
GSE76427_GSM2011312	C
GSE76427_GSM2011313	B
GSE76427_GSM2011314	B
GSE76427_GSM2011315	C
GSE76427_GSM2011316	A
GSE76427_GSM2011317	C
GSE76427_GSM2011318	B
GSE76427_GSM2011319	A
GSE76427_GSM2011320	C
GSE76427_GSM2011321	B
GSE76427_GSM2011322	B
GSE76427_GSM2011323	B
GSE76427_GSM2011324	B
GSE76427_GSM2011325	B
GSE76427_GSM2011326	C
GSE76427_GSM2011327	C
GSE76427_GSM2011328	C
GSE76427_GSM2011329	C
GSE76427_GSM2011330	C
GSE76427_GSM2011331	A
GSE76427_GSM2011332	A
GSE76427_GSM2011333	C
GSE76427_GSM2011334	C
GSE76427_GSM2011335	C
GSE76427_GSM2011336	C
GSE76427_GSM2011337	A
GSE76427_GSM2011338	A
GSE76427_GSM2011339	C
GSE76427_GSM2011340	A
GSE76427_GSM2011341	C
GSE76427_GSM2011342	B
GSE76427_GSM2011343	C
GSE76427_GSM2011344	C
GSE76427_GSM2011345	C
GSE76427_GSM2011346	B
GSE76427_GSM2011347	B
GSE76427_GSM2011348	C
GSE76427_GSM2011349	C
GSE76427_GSM2011350	A
GSE76427_GSM2011351	B
GSE76427_GSM2011352	B
GSE76427_GSM2011353	B
GSE76427_GSM2011354	A
GSE76427_GSM2011355	C
GSE76427_GSM2011356	B
GSE76427_GSM2011357	C
GSE76427_GSM2011358	C
GSE76427_GSM2011359	C
GSE76427_GSM2011360	B
GSE76427_GSM2011361	B
GSE76427_GSM2011362	C
GSE76427_GSM2011363	B
GSE76427_GSM2011364	C
GSE76427_GSM2011365	C
GSE76427_GSM2011366	C
GSE76427_GSM2011367	C
GSE76427_GSM2011368	C
GSE76427_GSM2011369	A
GSE76427_GSM2011370	C
GSE76427_GSM2011371	C
GSE76427_GSM2011372	C
GSE76427_GSM2011373	B
GSE76427_GSM2011374	C
GSE76427_GSM2011375	C
GSE76427_GSM2011376	C
GSE76427_GSM2011377	B
GSE76427_GSM2011378	B
GSE76427_GSM2011379	C
GSE76427_GSM2011380	C
GSE76427_GSM2011381	C
GSE76427_GSM2011382	C
GSE76427_GSM2011383	B
GSE76427_GSM2011384	C
GSE76427_GSM2011385	C
GSE76427_GSM2011386	C
GSE76427_GSM2011387	A
GSE76427_GSM2011388	A
GSE76427_GSM2011389	C
GSE76427_GSM2011390	B
GSE76427_GSM2011391	C
GSE76427_GSM2011392	C
GSE76427_GSM2011393	C
GSE76427_GSM2011394	C
GSE76427_GSM2011395	A
GSE76427_GSM2011396	C
GSE76427_GSM2011397	A
GSE76427_GSM2011398	B
GSE76427_GSM2011399	A
GSE76427_GSM2011400	A
GSE76427_GSM2011401	A
GSE76427_GSM2011402	A
GSE76427_GSM2011403	A
GSE76427_GSM2011404	A
GSE76427_GSM2011405	A
GSE76427_GSM2011406	C
GSE76427_GSM2011407	A
GSE76427_GSM2011408	A
GSE76427_GSM2011409	A
GSE76427_GSM2011410	A
GSE76427_GSM2011411	A
GSE76427_GSM2011412	A
GSE76427_GSM2011413	C
GSE76427_GSM2011414	A
GSE76427_GSM2011415	A
GSE76427_GSM2011416	C
GSE76427_GSM2011417	A
GSE76427_GSM2011418	A
GSE76427_GSM2011419	A
GSE76427_GSM2011420	C
GSE76427_GSM2011421	A
GSE76427_GSM2011422	C
GSE76427_GSM2011423	A
GSE76427_GSM2011424	A
GSE76427_GSM2011425	A
GSE76427_GSM2011426	A
GSE76427_GSM2011427	A
GSE76427_GSM2011428	A
GSE76427_GSM2011429	A
GSE76427_GSM2011430	A
GSE76427_GSM2011431	A
GSE76427_GSM2011432	A
GSE76427_GSM2011433	A
GSE76427_GSM2011434	A
GSE76427_GSM2011435	A
GSE76427_GSM2011436	A
GSE76427_GSM2011437	A
GSE76427_GSM2011438	C
GSE76427_GSM2011439	A
GSE76427_GSM2011440	A
GSE76427_GSM2011441	A
GSE76427_GSM2011442	A
GSE76427_GSM2011443	A
GSE76427_GSM2011444	A
GSE76427_GSM2011445	A
GSE76427_GSM2011446	A
GSE76427_GSM2011447	B
GSE76427_GSM2011448	A
GSE76427_GSM2011449	A
GSE76427_GSM2011450	A
GSE76427_GSM2011451	A
