# Supplementary material for: A scoring model based on ferroptosis genes for prognosis and immunotherapy response prediction and tumor microenvironment evaluation in liver hepatocellular carcinoma
Source: Aging (Albany NY). 2021 Nov 28;13(22):24866–81. doi: 10.18632/aging.203721 (PMC8660622; doi:10.18632/aging.203721)
Supplement: Supplementary Table 6 [file aging-13-203721-s006.xls]

## Sheet: Sheet1
Supplementary Table 6. The ferrscore of LIHC patients based on the built scoring model.
id	ferrscore
TCGA_TCGA-DD-AAE4	-85.6297
TCGA_TCGA-CC-A3M9	79.9426
TCGA_TCGA-DD-A4NI	-32.2793
TCGA_TCGA-G3-AAV3	0.999982
TCGA_TCGA-UB-A7MA	62.473
TCGA_TCGA-UB-A7MF	-1.92757
TCGA_TCGA-BC-A112	65.5976
TCGA_TCGA-BC-A10U	33.1445
TCGA_TCGA-BC-A5W4	-27.1565
TCGA_TCGA-FV-A3I1	41.6326
TCGA_TCGA-CC-A123	-84.9455
TCGA_TCGA-WQ-A9G7	-31.9275
TCGA_TCGA-ED-A66X	34.28
TCGA_TCGA-DD-A1EK	-26.2604
TCGA_TCGA-DD-AADM	-61.4143
TCGA_TCGA-MR-A8JO	-37.4012
TCGA_TCGA-QA-A7B7	54.5318
TCGA_TCGA-CC-A8HT	30.8512
TCGA_TCGA-FV-A4ZP	-125.305
TCGA_TCGA-DD-A4NJ	58.252
TCGA_TCGA-CC-5258	59.2943
TCGA_TCGA-EP-A2KB	-13.2059
TCGA_TCGA-G3-A25X	-14.0808
TCGA_TCGA-DD-AAD1	64.881
TCGA_TCGA-G3-A3CK	14.1419
TCGA_TCGA-DD-AACA	24.5232
TCGA_TCGA-5C-A9VH	12.9895
TCGA_TCGA-FV-A23B	29.2976
TCGA_TCGA-DD-AADR	-38.0306
TCGA_TCGA-DD-A4NQ	23.496
TCGA_TCGA-G3-A5SM	-26.3671
TCGA_TCGA-MI-A75E	-33.8494
TCGA_TCGA-DD-A11D	-6.33234
TCGA_TCGA-CC-5262	5.73029
TCGA_TCGA-2Y-A9GY	22.2844
TCGA_TCGA-ES-A2HT	-108.728
TCGA_TCGA-DD-AAW0	17.8202
TCGA_TCGA-G3-A3CI	-52.79
TCGA_TCGA-DD-AAVV	3.89308
TCGA_TCGA-DD-A39Y	-7.865
TCGA_TCGA-DD-A1EB	-2.01839
TCGA_TCGA-DD-AAD6	-51.2591
TCGA_TCGA-ED-A4XI	-6.43378
TCGA_TCGA-HP-A5MZ	-22.3775
TCGA_TCGA-DD-AAVU	-59.1309
TCGA_TCGA-DD-A4NO	6.85045
TCGA_TCGA-BC-A10W	105.17
TCGA_TCGA-LG-A9QC	11.7466
TCGA_TCGA-DD-A11C	18.4731
TCGA_TCGA-DD-AADB	43.8893
TCGA_TCGA-DD-AAVZ	13.9362
TCGA_TCGA-BC-A216	24.2087
TCGA_TCGA-DD-A1EF	45.7915
TCGA_TCGA-DD-AADL	32.5084
TCGA_TCGA-KR-A7K8	-29.3074
TCGA_TCGA-ED-A7PX	56.0569
TCGA_TCGA-DD-AADK	-47.4204
TCGA_TCGA-BW-A5NO	5.36044
TCGA_TCGA-DD-A39W	20.6095
TCGA_TCGA-GJ-A9DB	44.683
TCGA_TCGA-DD-A1EA	51.4129
TCGA_TCGA-UB-A7MD	18.8341
TCGA_TCGA-ES-A2HS	-104.706
TCGA_TCGA-G3-A3CJ	-85.1868
TCGA_TCGA-FV-A3R2	44.615
TCGA_TCGA-BW-A5NQ	67.8384
TCGA_TCGA-2Y-A9GZ	6.00499
TCGA_TCGA-4R-AA8I	33.68
TCGA_TCGA-DD-A4NG	-25.4245
TCGA_TCGA-RC-A6M5	-29.4195
TCGA_TCGA-2Y-A9H0	8.91909
TCGA_TCGA-DD-A11B	21.3371
TCGA_TCGA-G3-A25V	-22.4948
TCGA_TCGA-5R-AA1C	37.3542
TCGA_TCGA-ED-A8O6	5.99423
TCGA_TCGA-DD-AADD	50.8816
TCGA_TCGA-BC-A10S	-38.287
TCGA_TCGA-CC-A9FV	35.1593
TCGA_TCGA-DD-AAEB	-116.252
TCGA_TCGA-WX-AA44	26.223
TCGA_TCGA-PD-A5DF	17.3832
TCGA_TCGA-YA-A8S7	65.1931
TCGA_TCGA-5R-AA1D	-14.1441
TCGA_TCGA-DD-AACH	86.8971
TCGA_TCGA-CC-A8HV	5.42604
TCGA_TCGA-BW-A5NP	43.2625
TCGA_TCGA-G3-AAV0	-88.201
TCGA_TCGA-DD-AAED	-27.4271
TCGA_TCGA-DD-A73F	-11.022
TCGA_TCGA-DD-A4NN	25.6148
TCGA_TCGA-DD-AAEI	-47.7627
TCGA_TCGA-UB-AA0V	-4.43307
TCGA_TCGA-DD-AADO	-96.2087
TCGA_TCGA-DD-AAVY	0.256581
TCGA_TCGA-FV-A3R3	3.11946
TCGA_TCGA-DD-A4NS	48.5424
TCGA_TCGA-MI-A75H	-37.6035
TCGA_TCGA-UB-A7MC	55.803
TCGA_TCGA-FV-A4ZQ	49.3631
TCGA_TCGA-DD-AAEG	-11.6397
TCGA_TCGA-DD-AAD5	17.8988
TCGA_TCGA-K7-A5RG	24.1168
TCGA_TCGA-XR-A8TD	-4.23373
TCGA_TCGA-DD-AACY	-36.4635
TCGA_TCGA-CC-A9FU	30.7603
TCGA_TCGA-KR-A7K7	-54.4723
TCGA_TCGA-G3-A25Y	59.2929
TCGA_TCGA-K7-AAU7	66.4399
TCGA_TCGA-BC-A3KF	-2.99039
TCGA_TCGA-BC-A10Z	31.1524
TCGA_TCGA-UB-AA0U	43.416
TCGA_TCGA-DD-AAEE	-3.31006
TCGA_TCGA-ZP-A9D0	-3.92887
TCGA_TCGA-DD-A1EG	-6.18746
TCGA_TCGA-CC-A7IL	-38.3374
TCGA_TCGA-RC-A6M4	-30.446
TCGA_TCGA-ED-A7XP	32.9656
TCGA_TCGA-2Y-A9HA	34.9092
TCGA_TCGA-DD-AAE2	2.7534
TCGA_TCGA-DD-AADF	-63.7529
TCGA_TCGA-DD-AACW	9.26004
TCGA_TCGA-MI-A75I	12.0259
TCGA_TCGA-FV-A3I0	46.9345
TCGA_TCGA-2Y-A9H1	-116.695
TCGA_TCGA-CC-A8HU	34.1145
TCGA_TCGA-DD-AAD2	-15.8562
TCGA_TCGA-BC-A10R	-19.9317
TCGA_TCGA-G3-A5SL	-9.2978
TCGA_TCGA-CC-A1HT	109.541
TCGA_TCGA-2Y-A9GV	13.7217
TCGA_TCGA-ED-A7XO	-17.3427
TCGA_TCGA-CC-A5UC	-3.16119
TCGA_TCGA-DD-AAVQ	-15.2556
TCGA_TCGA-BD-A3EP	13.5294
TCGA_TCGA-DD-A39V	-65.198
TCGA_TCGA-DD-A3A1	-40.9085
TCGA_TCGA-DD-A4NR	28.7855
TCGA_TCGA-DD-AAC9	-75.3852
TCGA_TCGA-CC-5259	-115.953
TCGA_TCGA-DD-AADC	51.9446
TCGA_TCGA-ZS-A9CF	28.2779
TCGA_TCGA-NI-A8LF	-46.1446
TCGA_TCGA-DD-A39Z	-64.7968
TCGA_TCGA-G3-A7M5	-63.5826
TCGA_TCGA-MI-A75G	-23.7655
TCGA_TCGA-CC-A7IK	62.5681
TCGA_TCGA-G3-A5SJ	25.7205
TCGA_TCGA-ZS-A9CE	-34.0462
TCGA_TCGA-DD-A73B	8.81449
TCGA_TCGA-RC-A7SB	-37.567
TCGA_TCGA-DD-AADN	-109.79
TCGA_TCGA-CC-A5UE	49.4377
TCGA_TCGA-DD-AACZ	46.8773
TCGA_TCGA-DD-A3A3	-96.4581
TCGA_TCGA-2Y-A9H8	-13.5221
TCGA_TCGA-DD-AAEK	15.0326
TCGA_TCGA-DD-A4ND	43.3177
TCGA_TCGA-2Y-A9H7	-12.2485
TCGA_TCGA-RC-A7S9	-28.699
TCGA_TCGA-G3-A25S	-30.2586
TCGA_TCGA-BC-A217	36.211
TCGA_TCGA-DD-AAW2	-9.66782
TCGA_TCGA-2Y-A9H6	-16.4606
TCGA_TCGA-2Y-A9GW	-24.0821
TCGA_TCGA-DD-A73D	-16.0377
TCGA_TCGA-DD-A115	-1.28337
TCGA_TCGA-XR-A8TF	1.33824
TCGA_TCGA-DD-AADU	-77.3293
TCGA_TCGA-DD-AAE1	-27.3196
TCGA_TCGA-2Y-A9HB	-4.60321
TCGA_TCGA-BD-A2L6	-36.3744
TCGA_TCGA-DD-A3A9	-33.8256
TCGA_TCGA-KR-A7K2	-54.9994
TCGA_TCGA-ED-A66Y	56.4015
TCGA_TCGA-DD-AAE3	-77.6265
TCGA_TCGA-G3-AAV6	3.42837
TCGA_TCGA-ED-A97K	97.1939
TCGA_TCGA-DD-AAVW	23.2862
TCGA_TCGA-EP-A3RK	13.6138
TCGA_TCGA-FV-A496	-13.7708
TCGA_TCGA-CC-A3MB	39.784
TCGA_TCGA-CC-A7IF	-45.9331
TCGA_TCGA-ZS-A9CD	-31.8867
TCGA_TCGA-G3-A7M6	106.33
TCGA_TCGA-DD-A1ED	-29.2231
TCGA_TCGA-EP-A12J	29.9796
TCGA_TCGA-DD-A1EJ	46.6478
TCGA_TCGA-G3-AAV2	-19.5663
TCGA_TCGA-DD-AADY	39.8278
TCGA_TCGA-CC-5263	125.891
TCGA_TCGA-DD-AADP	14.0111
TCGA_TCGA-BC-A69I	-48.7424
TCGA_TCGA-5C-A9VG	37.1967
TCGA_TCGA-DD-A1EE	53.8076
TCGA_TCGA-BC-A110	-48.0209
TCGA_TCGA-GJ-A3OU	26.0695
TCGA_TCGA-G3-A25U	9.45464
TCGA_TCGA-DD-A4NL	-45.4048
TCGA_TCGA-BC-A10Q	47.4921
TCGA_TCGA-2Y-A9GU	-20.6531
TCGA_TCGA-ZP-A9CV	21.9843
TCGA_TCGA-DD-A113	15.9162
TCGA_TCGA-2Y-A9GT	-7.34442
TCGA_TCGA-CC-A3MC	-1.03543
TCGA_TCGA-DD-A73A	-28.8052
TCGA_TCGA-DD-AADG	-7.32691
TCGA_TCGA-FV-A2QR	22.6207
TCGA_TCGA-G3-AAV7	94.222
TCGA_TCGA-2Y-A9H4	-31.4922
TCGA_TCGA-3K-AAZ8	-12.8346
TCGA_TCGA-CC-5261	116.581
TCGA_TCGA-ZP-A9D2	130.692
TCGA_TCGA-2Y-A9H5	20.4428
TCGA_TCGA-G3-A25T	11.7576
TCGA_TCGA-DD-AAEA	-37.5873
TCGA_TCGA-RG-A7D4	11.3748
TCGA_TCGA-DD-AACD	-98.3289
TCGA_TCGA-DD-AAD8	-12.8734
TCGA_TCGA-5R-AAAM	-11.0703
TCGA_TCGA-EP-A3JL	-60.4705
TCGA_TCGA-DD-A73G	-118.275
TCGA_TCGA-G3-AAV4	35.9457
TCGA_TCGA-ED-A459	19.2356
TCGA_TCGA-DD-A73C	33.3732
TCGA_TCGA-MR-A520	-44.2628
TCGA_TCGA-RC-A6M3	-3.45034
TCGA_TCGA-DD-AACU	30.0827
TCGA_TCGA-WX-AA47	-109.708
TCGA_TCGA-DD-A3A4	-30.2309
TCGA_TCGA-DD-AADQ	-53.4405
TCGA_TCGA-CC-A8HS	75.8918
TCGA_TCGA-DD-A1EL	55.3382
TCGA_TCGA-WQ-AB4B	-84.2053
TCGA_TCGA-DD-A11A	17.4106
TCGA_TCGA-DD-AAD0	11.0745
TCGA_TCGA-DD-A3A6	-88.4966
TCGA_TCGA-DD-A114	100.195
TCGA_TCGA-5C-AAPD	-12.1037
TCGA_TCGA-HP-A5N0	2.50313
TCGA_TCGA-T1-A6J8	-17.1767
TCGA_TCGA-XR-A8TC	20.0099
TCGA_TCGA-DD-AACK	28.787
TCGA_TCGA-MI-A75C	-52.9971
TCGA_TCGA-DD-AACP	18.9632
TCGA_TCGA-DD-AACT	-43.0494
TCGA_TCGA-DD-A73E	54.4359
TCGA_TCGA-BC-4072	52.181
TCGA_TCGA-BC-4073	81.4797
TCGA_TCGA-XR-A8TG	41.5899
TCGA_TCGA-RC-A6M6	28.8651
TCGA_TCGA-BC-A69H	-50.8183
TCGA_TCGA-DD-AAC8	33.8685
TCGA_TCGA-DD-AADJ	-64.3877
TCGA_TCGA-2Y-A9H9	-10.9149
TCGA_TCGA-ED-A5KG	107.755
TCGA_TCGA-DD-AACO	-79.0742
TCGA_TCGA-G3-A25Z	-37.1806
TCGA_TCGA-DD-A4NV	29.5487
TCGA_TCGA-DD-A39X	-59.1365
TCGA_TCGA-EP-A2KA	-9.45727
TCGA_TCGA-DD-A1EC	46.9613
TCGA_TCGA-DD-AAD3	4.68106
TCGA_TCGA-DD-AACS	41.4996
TCGA_TCGA-BD-A3ER	-31.1396
TCGA_TCGA-GJ-A6C0	27.7773
TCGA_TCGA-2Y-A9GS	62.168
TCGA_TCGA-BC-A8YO	95.5917
TCGA_TCGA-CC-A9FW	30.0271
TCGA_TCGA-CC-A5UD	56.25
TCGA_TCGA-DD-A119	-71.8666
TCGA_TCGA-DD-AACB	-12.3359
TCGA_TCGA-FV-A495	-68.1185
TCGA_TCGA-DD-A1EH	67.937
TCGA_TCGA-DD-AAEH	-39.9312
TCGA_TCGA-DD-A4NE	34.4139
TCGA_TCGA-DD-AADV	36.7084
TCGA_TCGA-DD-AACX	-1.3243
TCGA_TCGA-DD-AACC	-35.7672
TCGA_TCGA-G3-A5SK	-49.9733
TCGA_TCGA-DD-AACV	18.3156
TCGA_TCGA-CC-5264	103.112
TCGA_TCGA-G3-A7M7	-50.7014
TCGA_TCGA-G3-AAUZ	-78.4151
TCGA_TCGA-RC-A7SK	-15.0517
TCGA_TCGA-DD-AACI	-62.8223
TCGA_TCGA-2V-A95S	10.451
TCGA_TCGA-DD-A4NH	56.3023
TCGA_TCGA-WX-AA46	-35.3714
TCGA_TCGA-2Y-A9H2	55.9065
TCGA_TCGA-DD-AAW3	-2.09298
TCGA_TCGA-ED-A82E	65.5619
TCGA_TCGA-DD-A4NP	-43.8987
TCGA_TCGA-G3-A6UC	4.61399
TCGA_TCGA-FV-A2QQ	-23.0883
TCGA_TCGA-ZP-A9D4	1.18077
TCGA_TCGA-DD-AAE6	-40.7175
TCGA_TCGA-DD-AACG	-58.5933
TCGA_TCGA-G3-A5SI	-9.12626
TCGA_TCGA-ED-A7PY	-31.1449
TCGA_TCGA-EP-A2KC	9.14658
TCGA_TCGA-BC-A10X	-13.9502
TCGA_TCGA-CC-A7IH	17.6158
TCGA_TCGA-DD-A3A8	-41.2907
TCGA_TCGA-DD-AACL	4.84151
TCGA_TCGA-DD-A116	-52.3191
TCGA_TCGA-CC-A7IG	-20.9555
TCGA_TCGA-DD-AAE9	-37.277
TCGA_TCGA-DD-AAVP	-28.6333
TCGA_TCGA-G3-AAV5	-14.7634
TCGA_TCGA-G3-A3CG	1.21139
TCGA_TCGA-CC-5260	126.301
TCGA_TCGA-CC-A7IJ	106.233
TCGA_TCGA-DD-A4NK	-3.43597
TCGA_TCGA-DD-A3A5	-34.8458
TCGA_TCGA-NI-A4U2	-63.574
TCGA_TCGA-DD-A4NF	26.8258
TCGA_TCGA-DD-AADI	-19.0423
TCGA_TCGA-DD-A4NA	103.468
TCGA_TCGA-BC-A10T	-1.21264
TCGA_TCGA-RC-A7SH	-21.6034
TCGA_TCGA-WJ-A86L	-1.35822
TCGA_TCGA-DD-AA3A	89.0479
TCGA_TCGA-CC-A7IE	-13.8736
TCGA_TCGA-DD-AAVS	32.6352
TCGA_TCGA-DD-AAE7	-43.8705
TCGA_TCGA-BC-A3KG	80.0457
TCGA_TCGA-DD-A3A2	-75.9241
TCGA_TCGA-DD-AAVR	-39.0274
TCGA_TCGA-CC-A7II	36.7681
TCGA_TCGA-DD-AACN	51.3407
TCGA_TCGA-2Y-A9GX	34.9897
TCGA_TCGA-CC-A3MA	89.1903
TCGA_TCGA-DD-AACQ	-14.7963
TCGA_TCGA-RC-A7SF	-64.5523
TCGA_TCGA-DD-AADW	88.7172
TCGA_TCGA-G3-A3CH	-10.6262
TCGA_TCGA-DD-A1EI	44.3864
TCGA_TCGA-ZP-A9CZ	26.6435
TCGA_TCGA-KR-A7K0	-11.2399
TCGA_TCGA-BC-A10Y	28.0115
TCGA_TCGA-ED-A8O5	27.5705
TCGA_TCGA-CC-A9FS	-12.8023
TCGA_TCGA-UB-A7MB	60.7646
TCGA_TCGA-ED-A627	33.5996
TCGA_TCGA-XR-A8TE	30.7007
TCGA_TCGA-DD-AACF	-17.6644
TCGA_TCGA-K7-A5RF	-27.1645
TCGA_TCGA-ZP-A9D1	23.024
TCGA_TCGA-DD-A3A7	-101.287
TCGA_TCGA-DD-AACE	-35.7692
TCGA_TCGA-2Y-A9H3	-91.1516
TCGA_TCGA-DD-A4NB	17.8129
TCGA_TCGA-EP-A26S	8.54636
TCGA_TCGA-DD-AAVX	-27.3179
TCGA_TCGA-ED-A7PZ	-33.4225
TCGA_TCGA-LG-A6GG	20.5264
TCGA_TCGA-UB-A7ME	7.72061
TCGA_TCGA-G3-A7M9	118.955
TCGA_TCGA-DD-AACJ	-57.0686
TCGA_TCGA-LG-A9QD	-54.1937
TCGA_TCGA-ZS-A9CG	-18.1174
TCGA_TCGA-K7-A6G5	-49.3607
TCGA_TCGA-DD-AADS	-136.215
TCGA_TCGA-DD-AAW1	-11.1401
TCGA_TCGA-DD-A118	-0.358035
TCGA_TCGA-DD-AADA	-42.8161
TCGA_TCGA-G3-AAV1	23.005
TCGA_TCGA-O8-A75V	-46.2072
TCGA_TCGA-ZP-A9CY	-1.72772
TCGA_TCGA-G3-A7M8	-42.8707
TCGA_TCGA-DD-AAE0	8.41056
GSE76427_GSM2011285	19.9429
GSE76427_GSM2011286	8.79468
GSE76427_GSM2011287	14.4689
GSE76427_GSM2011288	11.4117
GSE76427_GSM2011289	19.0269
GSE76427_GSM2011290	9.90241
GSE76427_GSM2011291	-0.515664
GSE76427_GSM2011292	-1.24364
GSE76427_GSM2011293	25.725
GSE76427_GSM2011294	23.0939
GSE76427_GSM2011295	12.1516
GSE76427_GSM2011296	16.6481
GSE76427_GSM2011297	-3.29673
GSE76427_GSM2011298	10.5723
GSE76427_GSM2011299	6.49993
GSE76427_GSM2011300	30.0935
GSE76427_GSM2011301	-5.92064
GSE76427_GSM2011302	0.405364
GSE76427_GSM2011303	6.1552
GSE76427_GSM2011304	15.3422
GSE76427_GSM2011305	-0.847645
GSE76427_GSM2011306	13.8181
GSE76427_GSM2011307	-18.8081
GSE76427_GSM2011308	0.900831
GSE76427_GSM2011309	14.807
GSE76427_GSM2011310	5.04342
GSE76427_GSM2011311	-16.0207
GSE76427_GSM2011312	8.12727
GSE76427_GSM2011313	3.26578
GSE76427_GSM2011314	1.14627
GSE76427_GSM2011315	7.44823
GSE76427_GSM2011316	6.59965
GSE76427_GSM2011317	-8.08766
GSE76427_GSM2011318	17.6442
GSE76427_GSM2011319	17.5217
GSE76427_GSM2011320	28.397
GSE76427_GSM2011321	13.8719
GSE76427_GSM2011322	43.6364
GSE76427_GSM2011323	-6.87936
GSE76427_GSM2011324	15.1955
GSE76427_GSM2011325	11.5384
GSE76427_GSM2011326	3.49855
GSE76427_GSM2011327	21.2804
GSE76427_GSM2011328	20.4582
GSE76427_GSM2011329	5.72781
GSE76427_GSM2011330	-3.39086
GSE76427_GSM2011331	-12.2168
GSE76427_GSM2011332	-20.1991
GSE76427_GSM2011333	-4.86537
GSE76427_GSM2011334	16.6995
GSE76427_GSM2011335	6.8291
GSE76427_GSM2011336	10.3039
GSE76427_GSM2011337	-7.13195
GSE76427_GSM2011338	-15.9688
GSE76427_GSM2011339	-9.48311
GSE76427_GSM2011340	-1.09944
GSE76427_GSM2011341	2.44749
GSE76427_GSM2011342	6.07257
GSE76427_GSM2011343	10.4724
GSE76427_GSM2011344	16.9073
GSE76427_GSM2011345	-1.87304
GSE76427_GSM2011346	8.42489
GSE76427_GSM2011347	28.2557
GSE76427_GSM2011348	16.9809
GSE76427_GSM2011349	-8.87287
GSE76427_GSM2011350	3.94706
GSE76427_GSM2011351	10.7147
GSE76427_GSM2011352	5.84095
GSE76427_GSM2011353	7.84022
GSE76427_GSM2011354	14.8722
GSE76427_GSM2011355	-5.9897
GSE76427_GSM2011356	8.13336
GSE76427_GSM2011357	-6.11134
GSE76427_GSM2011358	-8.94097
GSE76427_GSM2011359	10.2584
GSE76427_GSM2011360	0.0985797
GSE76427_GSM2011361	-8.1189
GSE76427_GSM2011362	-11.5143
GSE76427_GSM2011363	24.0079
GSE76427_GSM2011364	11.4281
GSE76427_GSM2011365	-3.20131
GSE76427_GSM2011366	8.48832
GSE76427_GSM2011367	-8.8184
GSE76427_GSM2011368	-3.44825
GSE76427_GSM2011369	12.1716
GSE76427_GSM2011370	10.755
GSE76427_GSM2011371	2.80435
GSE76427_GSM2011372	6.34779
GSE76427_GSM2011373	13.9352
GSE76427_GSM2011374	18.8854
GSE76427_GSM2011375	-0.228169
GSE76427_GSM2011376	0.903374
GSE76427_GSM2011377	26.5673
GSE76427_GSM2011378	14.41
GSE76427_GSM2011379	2.45964
GSE76427_GSM2011380	6.74479
GSE76427_GSM2011381	-8.7951
GSE76427_GSM2011382	26.0426
GSE76427_GSM2011383	-2.08822
GSE76427_GSM2011384	17.3542
GSE76427_GSM2011385	13.2951
GSE76427_GSM2011386	2.44872
GSE76427_GSM2011387	16.1974
GSE76427_GSM2011388	-1.16712
GSE76427_GSM2011389	16.4234
GSE76427_GSM2011390	-2.07347
GSE76427_GSM2011391	0.987824
GSE76427_GSM2011392	-0.705045
GSE76427_GSM2011393	13.8938
GSE76427_GSM2011394	6.31922
GSE76427_GSM2011395	-17.9168
GSE76427_GSM2011396	-7.84604
GSE76427_GSM2011397	4.29955
GSE76427_GSM2011398	3.87368
GSE76427_GSM2011399	-5.66457
GSE76427_GSM2011400	-7.68874
GSE76427_GSM2011401	-14.8071
GSE76427_GSM2011402	0.199807
GSE76427_GSM2011403	-7.21012
GSE76427_GSM2011404	-14.9586
GSE76427_GSM2011405	-12.5361
GSE76427_GSM2011406	-8.30885
GSE76427_GSM2011407	-17.5704
GSE76427_GSM2011408	-8.6726
GSE76427_GSM2011409	-20.9226
GSE76427_GSM2011410	-20.2076
GSE76427_GSM2011411	-10.7116
GSE76427_GSM2011412	-13.5127
GSE76427_GSM2011413	-8.20898
GSE76427_GSM2011414	-16.4494
GSE76427_GSM2011415	-12.5557
GSE76427_GSM2011416	-6.56932
GSE76427_GSM2011417	-15.8571
GSE76427_GSM2011418	-11.2399
GSE76427_GSM2011419	-9.74078
GSE76427_GSM2011420	-9.83353
GSE76427_GSM2011421	-13.0846
GSE76427_GSM2011422	10.8382
GSE76427_GSM2011423	-18.8542
GSE76427_GSM2011424	-25.2882
GSE76427_GSM2011425	-15.0379
GSE76427_GSM2011426	-20.2341
GSE76427_GSM2011427	-17.64
GSE76427_GSM2011428	-11.9955
GSE76427_GSM2011429	-14.5505
GSE76427_GSM2011430	-17.2078
GSE76427_GSM2011431	-12.4402
GSE76427_GSM2011432	-17.5424
GSE76427_GSM2011433	-15.6988
GSE76427_GSM2011434	-10.1839
GSE76427_GSM2011435	-19.3604
GSE76427_GSM2011436	-20.5877
GSE76427_GSM2011437	-12.4096
GSE76427_GSM2011438	-12.4665
GSE76427_GSM2011439	-22.7183
GSE76427_GSM2011440	-6.98244
GSE76427_GSM2011441	-19.4335
GSE76427_GSM2011442	-20.4661
GSE76427_GSM2011443	-18.2607
GSE76427_GSM2011444	-12.7721
GSE76427_GSM2011445	-15.1268
GSE76427_GSM2011446	-13.1262
GSE76427_GSM2011447	-9.69727
GSE76427_GSM2011448	-17.7965
GSE76427_GSM2011449	-11.793
GSE76427_GSM2011450	-11.7118
GSE76427_GSM2011451	-17.3418
