# Supplementary material for: A scoring model based on ferroptosis genes for prognosis and immunotherapy response prediction and tumor microenvironment evaluation in liver hepatocellular carcinoma
Source: Aging (Albany NY). 2021 Nov 28;13(22):24866–81. doi: 10.18632/aging.203721 (PMC8660622; doi:10.18632/aging.203721)
Supplement: Supplementary Table 7 [file aging-13-203721-s007.xlsx]

## Sheet: Sheet1
Supplementary Table 7. The classified high- and low-ferrscore LIHC patients based on the ferroptosis scoring model.
id	futime	fustat	ferrscore	sampleType	group （high vs. low ferrscore）
TCGA-DD-AAE4	1.66575	0	-85.6297	TCGA	Low
TCGA-CC-A3M9	0.821918	1	79.9426	TCGA	High
TCGA-DD-A4NI	2.23562	0	-32.2793	TCGA	Low
TCGA-G3-AAV3	1.12877	0	0.999982	TCGA	Low
TCGA-UB-A7MA	2.32329	0	62.473	TCGA	High
TCGA-UB-A7MF	0.586301	1	-1.92757	TCGA	Low
TCGA-BC-A112	0.419178	1	65.5976	TCGA	High
TCGA-BC-A10U	2.29315	1	33.1445	TCGA	High
TCGA-BC-A5W4	1.49863	1	-27.1565	TCGA	Low
TCGA-FV-A3I1	0.676712	1	41.6326	TCGA	High
TCGA-CC-A123	0.6	0	-84.9455	TCGA	Low
TCGA-WQ-A9G7	0.0821918	0	-31.9275	TCGA	Low
TCGA-ED-A66X	1.11233	0	34.28	TCGA	High
TCGA-DD-A1EK	1.52877	1	-26.2604	TCGA	Low
TCGA-DD-AADM	0.0328767	1	-61.4143	TCGA	Low
TCGA-MR-A8JO	0.90411	0	-37.4012	TCGA	Low
TCGA-QA-A7B7	0.257534	0	54.5318	TCGA	High
TCGA-CC-A8HT	0.383562	1	30.8512	TCGA	High
TCGA-FV-A4ZP	6.81096	1	-125.305	TCGA	Low
TCGA-DD-A4NJ	2.54247	0	58.252	TCGA	High
TCGA-CC-5258	0.353425	1	59.2943	TCGA	High
TCGA-EP-A2KB	1.63288	1	-13.2059	TCGA	Low
TCGA-G3-A25X	4.87397	0	-14.0808	TCGA	Low
TCGA-DD-AAD1	1.54521	0	64.881	TCGA	High
TCGA-G3-A3CK	1.60274	0	14.1419	TCGA	Low
TCGA-DD-AACA	6.30411	0	24.5232	TCGA	Low
TCGA-5C-A9VH	0.882192	0	12.9895	TCGA	Low
TCGA-FV-A23B	5.07397	1	29.2976	TCGA	Low
TCGA-DD-AADR	5.55616	0	-38.0306	TCGA	Low
TCGA-DD-A4NQ	1.02192	1	23.496	TCGA	Low
TCGA-G3-A5SM	1.42466	0	-26.3671	TCGA	Low
TCGA-MI-A75E	1.38904	0	-33.8494	TCGA	Low
TCGA-DD-A11D	4.27397	1	-6.33234	TCGA	Low
TCGA-CC-5262	0.282192	1	5.73029	TCGA	Low
TCGA-2Y-A9GY	2.07397	1	22.2844	TCGA	Low
TCGA-ES-A2HT	1.2	1	-108.728	TCGA	Low
TCGA-DD-AAW0	5.52055	0	17.8202	TCGA	Low
TCGA-G3-A3CI	0.493151	0	-52.79	TCGA	Low
TCGA-DD-AAVV	6.72603	0	3.89308	TCGA	Low
TCGA-DD-A39Y	0.468493	1	-7.865	TCGA	Low
TCGA-DD-A1EB	5.52603	0	-2.01839	TCGA	Low
TCGA-DD-AAD6	1.8411	0	-51.2591	TCGA	Low
TCGA-ED-A4XI	2.24384	0	-6.43378	TCGA	Low
TCGA-HP-A5MZ	0.249315	1	-22.3775	TCGA	Low
TCGA-DD-AAVU	6.03288	0	-59.1309	TCGA	Low
TCGA-DD-A4NO	6.15068	0	6.85045	TCGA	Low
TCGA-BC-A10W	0.249315	1	105.17	TCGA	High
TCGA-LG-A9QC	1.16438	0	11.7466	TCGA	Low
TCGA-DD-A11C	1.8137	0	18.4731	TCGA	Low
TCGA-DD-AADB	3.40274	0	43.8893	TCGA	High
TCGA-DD-AAVZ	5.20548	0	13.9362	TCGA	Low
TCGA-BC-A216	3.70137	0	24.2087	TCGA	Low
TCGA-DD-A1EF	1.07945	1	45.7915	TCGA	High
TCGA-DD-AADL	1.74247	0	32.5084	TCGA	High
TCGA-KR-A7K8	2.48219	0	-29.3074	TCGA	Low
TCGA-ED-A7PX	0.0164384	0	56.0569	TCGA	High
TCGA-DD-AADK	2.87397	0	-47.4204	TCGA	Low
TCGA-BW-A5NO	0.0547945	0	5.36044	TCGA	Low
TCGA-DD-A39W	2.26575	1	20.6095	TCGA	Low
TCGA-GJ-A9DB	0.183562	1	44.683	TCGA	High
TCGA-DD-A1EA	6.61644	0	51.4129	TCGA	High
TCGA-UB-A7MD	0.142466	1	18.8341	TCGA	Low
TCGA-ES-A2HS	1.88493	1	-104.706	TCGA	Low
TCGA-G3-A3CJ	1.6274	0	-85.1868	TCGA	Low
TCGA-FV-A3R2	0.531507	1	44.615	TCGA	High
TCGA-BW-A5NQ	0	0	67.8384	TCGA	High
TCGA-2Y-A9GZ	2.32329	1	6.00499	TCGA	Low
TCGA-4R-AA8I	0.717808	1	33.68	TCGA	High
TCGA-DD-A4NG	2.19726	1	-25.4245	TCGA	Low
TCGA-RC-A6M5	0.0410959	0	-29.4195	TCGA	Low
TCGA-2Y-A9H0	10.0685	0	8.91909	TCGA	Low
TCGA-DD-A11B	0.0383562	1	21.3371	TCGA	Low
TCGA-G3-A25V	2.35616	0	-22.4948	TCGA	Low
TCGA-5R-AA1C	1.42466	0	37.3542	TCGA	High
TCGA-ED-A8O6	0.153425	1	5.99423	TCGA	Low
TCGA-DD-AADD	3.3726	0	50.8816	TCGA	High
TCGA-BC-A10S	3.89863	1	-38.287	TCGA	Low
TCGA-CC-A9FV	0	0	35.1593	TCGA	High
TCGA-DD-AAEB	1.30959	0	-116.252	TCGA	Low
TCGA-WX-AA44	1.68493	0	26.223	TCGA	Low
TCGA-PD-A5DF	1.75068	1	17.3832	TCGA	Low
TCGA-YA-A8S7	1.12877	1	65.1931	TCGA	High
TCGA-5R-AA1D	1.23014	0	-14.1441	TCGA	Low
TCGA-DD-AACH	0.534247	1	86.8971	TCGA	High
TCGA-CC-A8HV	0.764384	1	5.42604	TCGA	Low
TCGA-BW-A5NP	0	0	43.2625	TCGA	High
TCGA-G3-AAV0	1.30411	0	-88.201	TCGA	Low
TCGA-DD-AAED	2.09041	0	-27.4271	TCGA	Low
TCGA-DD-A73F	2.9726	0	-11.022	TCGA	Low
TCGA-DD-A4NN	2.46301	1	25.6148	TCGA	Low
TCGA-DD-AAEI	4.19452	0	-47.7627	TCGA	Low
TCGA-UB-AA0V	0.860274	0	-4.43307	TCGA	Low
TCGA-DD-AADO	1.2411	0	-96.2087	TCGA	Low
TCGA-DD-AAVY	5.39726	0	0.256581	TCGA	Low
TCGA-FV-A3R3	1.00274	1	3.11946	TCGA	Low
TCGA-DD-A4NS	6.72877	1	48.5424	TCGA	High
TCGA-MI-A75H	2.04658	0	-37.6035	TCGA	Low
TCGA-UB-A7MC	1.36986	0	55.803	TCGA	High
TCGA-FV-A4ZQ	0.0328767	0	49.3631	TCGA	High
TCGA-DD-AAEG	1.96986	0	-11.6397	TCGA	Low
TCGA-DD-AAD5	3.68493	0	17.8988	TCGA	Low
TCGA-K7-A5RG	1.42192	0	24.1168	TCGA	Low
TCGA-XR-A8TD	2.82192	0	-4.23373	TCGA	Low
TCGA-DD-AACY	3.9726	0	-36.4635	TCGA	Low
TCGA-CC-A9FU	0	0	30.7603	TCGA	Low
TCGA-KR-A7K7	2.60548	0	-54.4723	TCGA	Low
TCGA-G3-A25Y	1.23836	1	59.2929	TCGA	High
TCGA-K7-AAU7	0.983562	0	66.4399	TCGA	High
TCGA-BC-A3KF	0.0219178	0	-2.99039	TCGA	Low
TCGA-BC-A10Z	0.0931507	1	31.1524	TCGA	High
TCGA-UB-AA0U	0.89589	0	43.416	TCGA	High
TCGA-DD-AAEE	2.21918	0	-3.31006	TCGA	Low
TCGA-ZP-A9D0	2.98904	0	-3.92887	TCGA	Low
TCGA-DD-A1EG	3.7589	1	-6.18746	TCGA	Low
TCGA-CC-A7IL	0.761644	1	-38.3374	TCGA	Low
TCGA-RC-A6M4	0.060274	0	-30.446	TCGA	Low
TCGA-ED-A7XP	1.09589	0	32.9656	TCGA	High
TCGA-2Y-A9HA	0.0986301	1	34.9092	TCGA	High
TCGA-DD-AAE2	1.74795	0	2.7534	TCGA	Low
TCGA-DD-AADF	0.315068	1	-63.7529	TCGA	Low
TCGA-DD-AACW	3.90137	0	9.26004	TCGA	Low
TCGA-MI-A75I	1.72603	0	12.0259	TCGA	Low
TCGA-FV-A3I0	2.32329	0	46.9345	TCGA	High
TCGA-2Y-A9H1	3.36712	1	-116.695	TCGA	Low
TCGA-CC-A8HU	0.942466	1	34.1145	TCGA	High
TCGA-DD-AAD2	1.80274	0	-15.8562	TCGA	Low
TCGA-BC-A10R	0.843836	1	-19.9317	TCGA	Low
TCGA-G3-A5SL	1.70137	0	-9.2978	TCGA	Low
TCGA-CC-A1HT	0.276712	1	109.541	TCGA	High
TCGA-2Y-A9GV	6.93699	1	13.7217	TCGA	Low
TCGA-ED-A7XO	1.16986	0	-17.3427	TCGA	Low
TCGA-CC-A5UC	0.950685	1	-3.16119	TCGA	Low
TCGA-DD-AAVQ	7.47397	0	-15.2556	TCGA	Low
TCGA-BD-A3EP	1.12055	0	13.5294	TCGA	Low
TCGA-DD-A39V	1.76164	1	-65.198	TCGA	Low
TCGA-DD-A3A1	0.638356	1	-40.9085	TCGA	Low
TCGA-DD-A4NR	0.0246575	1	28.7855	TCGA	Low
TCGA-DD-AAC9	0.950685	0	-75.3852	TCGA	Low
TCGA-CC-5259	0.684932	0	-115.953	TCGA	Low
TCGA-DD-AADC	1.16438	1	51.9446	TCGA	High
TCGA-ZS-A9CF	6.60822	0	28.2779	TCGA	Low
TCGA-NI-A8LF	2.18904	0	-46.1446	TCGA	Low
TCGA-DD-A39Z	1.64658	1	-64.7968	TCGA	Low
TCGA-G3-A7M5	1.22466	0	-63.5826	TCGA	Low
TCGA-MI-A75G	1.91233	0	-23.7655	TCGA	Low
TCGA-CC-A7IK	0.717808	1	62.5681	TCGA	High
TCGA-G3-A5SJ	1.91233	0	25.7205	TCGA	Low
TCGA-ZS-A9CE	3.4	0	-34.0462	TCGA	Low
TCGA-DD-A73B	0.775342	1	8.81449	TCGA	Low
TCGA-RC-A7SB	1.61096	0	-37.567	TCGA	Low
TCGA-DD-AADN	2.46027	0	-109.79	TCGA	Low
TCGA-CC-A5UE	0.745205	1	49.4377	TCGA	High
TCGA-DD-AACZ	0.468493	1	46.8773	TCGA	High
TCGA-DD-A3A3	1.46575	1	-96.4581	TCGA	Low
TCGA-2Y-A9H8	1.73425	1	-13.5221	TCGA	Low
TCGA-DD-AAEK	2.92329	0	15.0326	TCGA	Low
TCGA-DD-A4ND	7.52329	0	43.3177	TCGA	High
TCGA-2Y-A9H7	3.2	0	-12.2485	TCGA	Low
TCGA-RC-A7S9	1.75342	0	-28.699	TCGA	Low
TCGA-G3-A25S	1.13973	1	-30.2586	TCGA	Low
TCGA-BC-A217	3.8274	1	36.211	TCGA	High
TCGA-DD-AAW2	5.08219	0	-9.66782	TCGA	Low
TCGA-2Y-A9H6	0.978082	0	-16.4606	TCGA	Low
TCGA-2Y-A9GW	3.48219	1	-24.0821	TCGA	Low
TCGA-DD-A73D	1.89863	0	-16.0377	TCGA	Low
TCGA-DD-A115	6.96438	1	-1.28337	TCGA	Low
TCGA-XR-A8TF	1.89863	1	1.33824	TCGA	Low
TCGA-DD-AADU	1.51781	0	-77.3293	TCGA	Low
TCGA-DD-AAE1	1.51233	0	-27.3196	TCGA	Low
TCGA-2Y-A9HB	0.712329	0	-4.60321	TCGA	Low
TCGA-BD-A2L6	3.73425	0	-36.3744	TCGA	Low
TCGA-DD-A3A9	2.55068	1	-33.8256	TCGA	Low
TCGA-KR-A7K2	2.27123	0	-54.9994	TCGA	Low
TCGA-ED-A66Y	0.810959	1	56.4015	TCGA	High
TCGA-DD-AAE3	1.55068	0	-77.6265	TCGA	Low
TCGA-G3-AAV6	0.178082	1	3.42837	TCGA	Low
TCGA-ED-A97K	0.0164384	0	97.1939	TCGA	High
TCGA-DD-AAVW	6.34795	0	23.2862	TCGA	Low
TCGA-EP-A3RK	0.994521	0	13.6138	TCGA	Low
TCGA-FV-A496	0.0273973	0	-13.7708	TCGA	Low
TCGA-CC-A3MB	0.863014	1	39.784	TCGA	High
TCGA-CC-A7IF	1.77808	1	-45.9331	TCGA	Low
TCGA-ZS-A9CD	3.79726	1	-31.8867	TCGA	Low
TCGA-G3-A7M6	1.73151	0	106.33	TCGA	High
TCGA-DD-A1ED	6.30411	0	-29.2231	TCGA	Low
TCGA-EP-A12J	1.56164	0	29.9796	TCGA	Low
TCGA-DD-A1EJ	2.75342	1	46.6478	TCGA	High
TCGA-G3-AAV2	1.01918	0	-19.5663	TCGA	Low
TCGA-DD-AADY	1.52055	0	39.8278	TCGA	High
TCGA-CC-5263	0.353425	1	125.891	TCGA	High
TCGA-DD-AADP	1.25479	0	14.0111	TCGA	Low
TCGA-BC-A69I	1.06027	0	-48.7424	TCGA	Low
TCGA-5C-A9VG	0.89863	0	37.1967	TCGA	High
TCGA-DD-A1EE	0.956164	1	53.8076	TCGA	High
TCGA-BC-A110	5.79726	1	-48.0209	TCGA	Low
TCGA-GJ-A3OU	2.40822	0	26.0695	TCGA	Low
TCGA-G3-A25U	4.48219	0	9.45464	TCGA	Low
TCGA-DD-A4NL	4.68767	0	-45.4048	TCGA	Low
TCGA-BC-A10Q	3.10959	1	47.4921	TCGA	High
TCGA-2Y-A9GU	5.31233	0	-20.6531	TCGA	Low
TCGA-ZP-A9CV	2.98082	1	21.9843	TCGA	Low
TCGA-DD-A113	6.64384	0	15.9162	TCGA	Low
TCGA-2Y-A9GT	4.44932	1	-7.34442	TCGA	Low
TCGA-CC-A3MC	0.994521	0	-1.03543	TCGA	Low
TCGA-DD-A73A	1.99452	0	-28.8052	TCGA	Low
TCGA-DD-AADG	3.13699	0	-7.32691	TCGA	Low
TCGA-FV-A2QR	1.59178	1	22.6207	TCGA	Low
TCGA-G3-AAV7	0.989041	0	94.222	TCGA	High
TCGA-2Y-A9H4	3.97808	0	-31.4922	TCGA	Low
TCGA-3K-AAZ8	1.08493	0	-12.8346	TCGA	Low
TCGA-CC-5261	0.265753	1	116.581	TCGA	High
TCGA-ZP-A9D2	2.09589	1	130.692	TCGA	High
TCGA-2Y-A9H5	1.52055	1	20.4428	TCGA	Low
TCGA-G3-A25T	4.25479	0	11.7576	TCGA	Low
TCGA-DD-AAEA	1.57534	0	-37.5873	TCGA	Low
TCGA-RG-A7D4	3.00822	0	11.3748	TCGA	Low
TCGA-DD-AACD	1.04384	1	-98.3289	TCGA	Low
TCGA-DD-AAD8	3.33973	0	-12.8734	TCGA	Low
TCGA-5R-AAAM	0.126027	1	-11.0703	TCGA	Low
TCGA-EP-A3JL	0.830137	0	-60.4705	TCGA	Low
TCGA-DD-A73G	9.52877	0	-118.275	TCGA	Low
TCGA-G3-AAV4	0.0739726	1	35.9457	TCGA	High
TCGA-ED-A459	2.49315	0	19.2356	TCGA	Low
TCGA-DD-A73C	1.92055	0	33.3732	TCGA	High
TCGA-MR-A520	0.627397	0	-44.2628	TCGA	Low
TCGA-RC-A6M3	0	0	-3.45034	TCGA	Low
TCGA-DD-AACU	4.29315	0	30.0827	TCGA	Low
TCGA-WX-AA47	1.52329	1	-109.708	TCGA	Low
TCGA-DD-A3A4	1.67671	1	-30.2309	TCGA	Low
TCGA-DD-AADQ	1.19452	0	-53.4405	TCGA	Low
TCGA-CC-A8HS	0.821918	1	75.8918	TCGA	High
TCGA-DD-A1EL	1.13699	1	55.3382	TCGA	High
TCGA-WQ-AB4B	1.08219	0	-84.2053	TCGA	Low
TCGA-DD-A11A	0.216438	0	17.4106	TCGA	Low
TCGA-DD-AAD0	0.375342	0	11.0745	TCGA	Low
TCGA-DD-A3A6	8.92603	1	-88.4966	TCGA	Low
TCGA-DD-A114	3.14795	1	100.195	TCGA	High
TCGA-5C-AAPD	0.0547945	0	-12.1037	TCGA	Low
TCGA-HP-A5N0	2.06027	1	2.50313	TCGA	Low
TCGA-T1-A6J8	0.0630137	0	-17.1767	TCGA	Low
TCGA-XR-A8TC	3.66849	0	20.0099	TCGA	Low
TCGA-DD-AACK	0.0246575	0	28.787	TCGA	Low
TCGA-MI-A75C	0.79726	0	-52.9971	TCGA	Low
TCGA-DD-AACP	1.13699	0	18.9632	TCGA	Low
TCGA-DD-AACT	4.27945	0	-43.0494	TCGA	Low
TCGA-DD-A73E	0.120548	0	54.4359	TCGA	High
TCGA-BC-4072	4.08219	1	52.181	TCGA	High
TCGA-BC-4073	2.32603	0	81.4797	TCGA	High
TCGA-XR-A8TG	2.46027	0	41.5899	TCGA	High
TCGA-RC-A6M6	0.0246575	0	28.8651	TCGA	Low
TCGA-BC-A69H	1.21644	0	-50.8183	TCGA	Low
TCGA-DD-AAC8	0.0438356	1	33.8685	TCGA	High
TCGA-DD-AADJ	2.92055	0	-64.3877	TCGA	Low
TCGA-2Y-A9H9	1.90959	0	-10.9149	TCGA	Low
TCGA-ED-A5KG	2.33973	0	107.755	TCGA	High
TCGA-DD-AACO	5.13973	0	-79.0742	TCGA	Low
TCGA-G3-A25Z	1.79452	0	-37.1806	TCGA	Low
TCGA-DD-A4NV	6.56986	0	29.5487	TCGA	Low
TCGA-DD-A39X	4.6411	1	-59.1365	TCGA	Low
TCGA-EP-A2KA	1.71781	1	-9.45727	TCGA	Low
TCGA-DD-A1EC	1.64932	0	46.9613	TCGA	High
TCGA-DD-AAD3	3.54795	0	4.68106	TCGA	Low
TCGA-DD-AACS	4.94247	0	41.4996	TCGA	High
TCGA-BD-A3ER	3.05479	0	-31.1396	TCGA	Low
TCGA-GJ-A6C0	0.0849315	1	27.7773	TCGA	Low
TCGA-2Y-A9GS	1.98356	1	62.168	TCGA	High
TCGA-BC-A8YO	1.53973	0	95.5917	TCGA	High
TCGA-CC-A9FW	0.679452	0	30.0271	TCGA	Low
TCGA-CC-A5UD	0.832877	1	56.25	TCGA	High
TCGA-DD-A119	0.610959	1	-71.8666	TCGA	Low
TCGA-DD-AACB	6.36712	0	-12.3359	TCGA	Low
TCGA-FV-A495	0.00273973	0	-68.1185	TCGA	Low
TCGA-DD-A1EH	4.09589	0	67.937	TCGA	High
TCGA-DD-AAEH	2.14795	0	-39.9312	TCGA	Low
TCGA-DD-A4NE	1.80822	1	34.4139	TCGA	High
TCGA-DD-AADV	1.5726	0	36.7084	TCGA	High
TCGA-DD-AACX	0.465753	0	-1.3243	TCGA	Low
TCGA-DD-AACC	4.61644	1	-35.7672	TCGA	Low
TCGA-G3-A5SK	2.03836	0	-49.9733	TCGA	Low
TCGA-DD-AACV	4.19452	0	18.3156	TCGA	Low
TCGA-CC-5264	0.279452	1	103.112	TCGA	High
TCGA-G3-A7M7	0.989041	0	-50.7014	TCGA	Low
TCGA-G3-AAUZ	1.31507	0	-78.4151	TCGA	Low
TCGA-RC-A7SK	1.29315	0	-15.0517	TCGA	Low
TCGA-DD-AACI	4.43288	0	-62.8223	TCGA	Low
TCGA-DD-A4NH	2.51233	0	56.3023	TCGA	High
TCGA-WX-AA46	2.07123	0	-35.3714	TCGA	Low
TCGA-2Y-A9H2	4.74247	0	55.9065	TCGA	High
TCGA-DD-AAW3	4.47397	0	-2.09298	TCGA	Low
TCGA-ED-A82E	1.11781	0	65.5619	TCGA	High
TCGA-DD-A4NP	9.06301	0	-43.8987	TCGA	Low
TCGA-G3-A6UC	1.83836	0	4.61399	TCGA	Low
TCGA-FV-A2QQ	1.99726	0	-23.0883	TCGA	Low
TCGA-ZP-A9D4	1.08219	0	1.18077	TCGA	Low
TCGA-DD-AAE6	0.386301	0	-40.7175	TCGA	Low
TCGA-DD-AACG	1.28493	1	-58.5933	TCGA	Low
TCGA-G3-A5SI	2.10411	1	-9.12626	TCGA	Low
TCGA-ED-A7PY	1.06849	0	-31.1449	TCGA	Low
TCGA-EP-A2KC	0.0520548	1	9.14658	TCGA	Low
TCGA-BC-A10X	2.10959	1	-13.9502	TCGA	Low
TCGA-CC-A7IH	1	0	17.6158	TCGA	Low
TCGA-DD-A3A8	0.030137	1	-41.2907	TCGA	Low
TCGA-DD-AACL	0.293151	1	4.84151	TCGA	Low
TCGA-DD-A116	4.44384	1	-52.3191	TCGA	Low
TCGA-CC-A7IG	0.819178	1	-20.9555	TCGA	Low
TCGA-DD-AAE9	1.97808	0	-37.277	TCGA	Low
TCGA-DD-AAVP	7.53973	0	-28.6333	TCGA	Low
TCGA-G3-AAV5	0.969863	0	-14.7634	TCGA	Low
TCGA-G3-A3CG	1.84384	0	1.21139	TCGA	Low
TCGA-CC-5260	0.238356	1	126.301	TCGA	High
TCGA-CC-A7IJ	1.04658	0	106.233	TCGA	High
TCGA-DD-A4NK	3.31507	1	-3.43597	TCGA	Low
TCGA-DD-A3A5	8.56164	1	-34.8458	TCGA	Low
TCGA-NI-A4U2	4.90685	1	-63.574	TCGA	Low
TCGA-DD-A4NF	2.58082	0	26.8258	TCGA	Low
TCGA-DD-AADI	2.9726	0	-19.0423	TCGA	Low
TCGA-DD-A4NA	2.76164	0	103.468	TCGA	High
TCGA-BC-A10T	2.29315	1	-1.21264	TCGA	Low
TCGA-RC-A7SH	1.28219	0	-21.6034	TCGA	Low
TCGA-WJ-A86L	0.945205	0	-1.35822	TCGA	Low
TCGA-DD-AA3A	1.12329	1	89.0479	TCGA	High
TCGA-CC-A7IE	0.594521	1	-13.8736	TCGA	Low
TCGA-DD-AAVS	4.99452	0	32.6352	TCGA	High
TCGA-DD-AAE7	1.76438	0	-43.8705	TCGA	Low
TCGA-BC-A3KG	1.86301	0	80.0457	TCGA	High
TCGA-DD-A3A2	5.83836	1	-75.9241	TCGA	Low
TCGA-DD-AAVR	6.88493	0	-39.0274	TCGA	Low
TCGA-CC-A7II	1.09315	0	36.7681	TCGA	High
TCGA-DD-AACN	3.56712	0	51.3407	TCGA	High
TCGA-2Y-A9GX	6.69041	0	34.9897	TCGA	High
TCGA-CC-A3MA	0.830137	1	89.1903	TCGA	High
TCGA-DD-AACQ	1.18356	1	-14.7963	TCGA	Low
TCGA-RC-A7SF	1.5863	0	-64.5523	TCGA	Low
TCGA-DD-AADW	1.60822	0	88.7172	TCGA	High
TCGA-G3-A3CH	2.13699	0	-10.6262	TCGA	Low
TCGA-DD-A1EI	0.50137	0	44.3864	TCGA	High
TCGA-ZP-A9CZ	1.93425	0	26.6435	TCGA	Low
TCGA-KR-A7K0	0.178082	1	-11.2399	TCGA	Low
TCGA-BC-A10Y	1.94795	1	28.0115	TCGA	Low
TCGA-ED-A8O5	1.11233	0	27.5705	TCGA	Low
TCGA-CC-A9FS	0.578082	0	-12.8023	TCGA	Low
TCGA-UB-A7MB	1.64658	0	60.7646	TCGA	High
TCGA-ED-A627	1.1589	0	33.5996	TCGA	High
TCGA-XR-A8TE	2.53425	0	30.7007	TCGA	Low
TCGA-DD-AACF	1	1	-17.6644	TCGA	Low
TCGA-K7-A5RF	1.72877	0	-27.1645	TCGA	Low
TCGA-ZP-A9D1	0.0575342	0	23.024	TCGA	Low
TCGA-DD-A3A7	1.14795	1	-101.287	TCGA	Low
TCGA-DD-AACE	5.98356	0	-35.7692	TCGA	Low
TCGA-2Y-A9H3	4.15342	0	-91.1516	TCGA	Low
TCGA-DD-A4NB	2.70959	0	17.8129	TCGA	Low
TCGA-EP-A26S	1.66575	0	8.54636	TCGA	Low
TCGA-DD-AAVX	4.70685	0	-27.3179	TCGA	Low
TCGA-ED-A7PZ	0.0164384	0	-33.4225	TCGA	Low
TCGA-LG-A6GG	1.06027	0	20.5264	TCGA	Low
TCGA-UB-A7ME	1.33151	0	7.72061	TCGA	Low
TCGA-G3-A7M9	0.153425	1	118.955	TCGA	High
TCGA-DD-AACJ	5.7589	0	-57.0686	TCGA	Low
TCGA-LG-A9QD	1.00274	0	-54.1937	TCGA	Low
TCGA-ZS-A9CG	0.934247	0	-18.1174	TCGA	Low
TCGA-K7-A6G5	1.40274	0	-49.3607	TCGA	Low
TCGA-DD-AADS	1.29863	0	-136.215	TCGA	Low
TCGA-DD-AAW1	5.44932	0	-11.1401	TCGA	Low
TCGA-DD-A118	9.41644	0	-0.358035	TCGA	Low
TCGA-DD-AADA	3.37808	0	-42.8161	TCGA	Low
TCGA-G3-AAV1	0.983562	1	23.005	TCGA	Low
TCGA-O8-A75V	1.47397	0	-46.2072	TCGA	Low
TCGA-ZP-A9CY	2.14247	0	-1.72772	TCGA	Low
TCGA-G3-A7M8	1.17808	0	-42.8707	TCGA	Low
TCGA-DD-AAE0	1.52055	0	8.41056	TCGA	Low
GSM2011285	2.5589	0	19.9429	GSE76427	Low
GSM2011286	2.16986	0	8.79468	GSE76427	Low
GSM2011287	0.0410959	0	14.4689	GSE76427	Low
GSM2011288	0.490411	1	11.4117	GSE76427	Low
GSM2011289	0.980822	1	19.0269	GSE76427	Low
GSM2011290	0.030137	0	9.90241	GSE76427	Low
GSM2011291	0.580822	0	-0.515664	GSE76427	Low
GSM2011292	0.0410959	0	-1.24364	GSE76427	Low
GSM2011293	1.8	0	25.725	GSE76427	Low
GSM2011294	0.0712329	1	23.0939	GSE76427	Low
GSM2011295	0.0410959	0	12.1516	GSE76427	Low
GSM2011296	2.5589	0	16.6481	GSE76427	Low
GSM2011297	1.50137	1	-3.29673	GSE76427	Low
GSM2011298	2.09041	0	10.5723	GSE76427	Low
GSM2011299	3.61918	1	6.49993	GSE76427	Low
GSM2011300	0.0191781	0	30.0935	GSE76427	Low
GSM2011301	0.0712329	0	-5.92064	GSE76427	Low
GSM2011302	4.81918	0	0.405364	GSE76427	Low
GSM2011303	3.03014	0	6.1552	GSE76427	Low
GSM2011304	0.0410959	0	15.3422	GSE76427	Low
GSM2011305	0.580822	0	-0.847645	GSE76427	Low
GSM2011306	1.70137	1	13.8181	GSE76427	Low
GSM2011307	0.780822	0	-18.8081	GSE76427	Low
GSM2011308	1.21918	0	0.900831	GSE76427	Low
GSM2011309	1.13973	0	14.807	GSE76427	Low
GSM2011310	1.07123	0	5.04342	GSE76427	Low
GSM2011311	1.27123	0	-16.0207	GSE76427	Low
GSM2011312	0.750685	0	8.12727	GSE76427	Low
GSM2011313	2.26027	0	3.26578	GSE76427	Low
GSM2011314	0.528767	0	1.14627	GSE76427	Low
GSM2011315	0.0712329	1	7.44823	GSE76427	Low
GSM2011316	2.03014	0	6.59965	GSE76427	Low
GSM2011317	1.64932	0	-8.08766	GSE76427	Low
GSM2011318	1.78904	0	17.6442	GSE76427	Low
GSM2011319	0.890411	0	17.5217	GSE76427	Low
GSM2011320	2.70959	0	28.397	GSE76427	Low
GSM2011321	2.78904	0	13.8719	GSE76427	Low
GSM2011322	0.419178	1	43.6364	GSE76427	High
GSM2011323	0.550685	0	-6.87936	GSE76427	Low
GSM2011324	0.520548	0	15.1955	GSE76427	Low
GSM2011325	0.679452	0	11.5384	GSE76427	Low
GSM2011326	0.150685	1	3.49855	GSE76427	Low
GSM2011327	3.2	0	21.2804	GSE76427	Low
GSM2011328	2.78904	0	20.4582	GSE76427	Low
GSM2011329	4.78904	0	5.72781	GSE76427	Low
GSM2011330	1.38082	0	-3.39086	GSE76427	Low
GSM2011331	2.66027	0	-12.2168	GSE76427	Low
GSM2011332	4.18904	0	-20.1991	GSE76427	Low
GSM2011333	5.7589	0	-4.86537	GSE76427	Low
GSM2011334	5.7589	0	16.6995	GSE76427	Low
GSM2011335	3.98082	1	6.8291	GSE76427	Low
GSM2011336	4.98082	0	10.3039	GSE76427	Low
GSM2011337	0.641096	0	-7.13195	GSE76427	Low
GSM2011338	0.520548	1	-15.9688	GSE76427	Low
GSM2011339	3.27945	0	-9.48311	GSE76427	Low
GSM2011340	0.780822	0	-1.09944	GSE76427	Low
GSM2011341	0.0191781	0	2.44749	GSE76427	Low
GSM2011342	0.339726	0	6.07257	GSE76427	Low
GSM2011343	0.580822	0	10.4724	GSE76427	Low
GSM2011344	0.780822	0	16.9073	GSE76427	Low
GSM2011345	6.29041	1	-1.87304	GSE76427	Low
GSM2011346	0.189041	1	8.42489	GSE76427	Low
GSM2011347	1.16986	0	28.2557	GSE76427	Low
GSM2011348	0.0191781	0	16.9809	GSE76427	Low
GSM2011349	4.98082	0	-8.87287	GSE76427	Low
GSM2011350	2.70959	1	3.94706	GSE76427	Low
GSM2011351	0.441096	0	10.7147	GSE76427	Low
GSM2011352	0.539726	0	5.84095	GSE76427	Low
GSM2011353	0.550685	0	7.84022	GSE76427	Low
GSM2011354	0.6	1	14.8722	GSE76427	Low
GSM2011355	4.98082	0	-5.9897	GSE76427	Low
GSM2011356	0.0191781	0	8.13336	GSE76427	Low
GSM2011357	3.2	0	-6.11134	GSE76427	Low
GSM2011358	3.2	0	-8.94097	GSE76427	Low
GSM2011359	0.0712329	1	10.2584	GSE76427	Low
GSM2011360	0.10137	0	0.0985797	GSE76427	Low
GSM2011361	3.63014	0	-8.1189	GSE76427	Low
GSM2011362	0.128767	0	-11.5143	GSE76427	Low
GSM2011363	0.0191781	0	24.0079	GSE76427	Low
GSM2011364	2.46027	0	11.4281	GSE76427	Low
GSM2011365	0.0410959	0	-3.20131	GSE76427	Low
GSM2011366	0.389041	0	8.48832	GSE76427	Low
GSM2011367	1.67123	0	-8.8184	GSE76427	Low
GSM2011368	0.649315	0	-3.44825	GSE76427	Low
GSM2011369	0.780822	0	12.1716	GSE76427	Low
GSM2011370	0.30137	0	10.755	GSE76427	Low
GSM2011371	1.67945	0	2.80435	GSE76427	Low
GSM2011372	0.920548	1	6.34779	GSE76427	Low
GSM2011373	2.46027	0	13.9352	GSE76427	Low
GSM2011374	0.030137	0	18.8854	GSE76427	Low
GSM2011375	4.70137	0	-0.228169	GSE76427	Low
GSM2011376	4.12055	0	0.903374	GSE76427	Low
GSM2011377	0.449315	1	26.5673	GSE76427	Low
GSM2011378	0.939726	0	14.41	GSE76427	Low
GSM2011379	0.030137	0	2.45964	GSE76427	Low
GSM2011380	1.76986	1	6.74479	GSE76427	Low
GSM2011381	7.7589	0	-8.7951	GSE76427	Low
GSM2011382	4.81918	1	26.0426	GSE76427	Low
GSM2011383	1.96986	0	-2.08822	GSE76427	Low
GSM2011384	0.060274	0	17.3542	GSE76427	Low
GSM2011385	3.9589	1	13.2951	GSE76427	Low
GSM2011386	3.78082	0	2.44872	GSE76427	Low
GSM2011387	1.70959	1	16.1974	GSE76427	Low
GSM2011388	0.649315	1	-1.16712	GSE76427	Low
GSM2011389	0.0410959	0	16.4234	GSE76427	Low
GSM2011390	3.63014	0	-2.07347	GSE76427	Low
GSM2011391	4.70959	0	0.987824	GSE76427	Low
GSM2011392	4.81918	0	-0.705045	GSE76427	Low
GSM2011393	1.01918	0	13.8938	GSE76427	Low
GSM2011394	0.0410959	0	6.31922	GSE76427	Low
GSM2011395	4.35068	0	-17.9168	GSE76427	Low
GSM2011396	3.58082	0	-7.84604	GSE76427	Low
GSM2011397	3.46027	0	4.29955	GSE76427	Low
GSM2011398	1.1589	0	3.87368	GSE76427	Low
GSM2011399	4.43014	0	-5.66457	GSE76427	Low
